1 **SDR enzymes oxidize specific lipidic alkynylcarbinols into cytotoxic**  
2 **protein-reactive species**

3 Pascal Demange<sup>1,¶</sup>, Etienne Joly<sup>1,¶</sup>, Julien Marcoux<sup>1,¶</sup>, Patrick R. A. Zanon<sup>2</sup>, Dymytrii Listunov<sup>3,4</sup>,  
4 Pauline Rullière<sup>3</sup>, Cécile Barthes<sup>4</sup>, Céline Noirot<sup>5</sup>, Jean-Baptiste Izquierdo<sup>1</sup>, Karen Pradines<sup>1,6</sup>,  
5 Romain Hee<sup>1,6</sup>, Maria Vieira de Brito<sup>4,7</sup>, Marlène Marcellin<sup>1</sup>, Rémi-Félix Serre<sup>8</sup>, Olivier Bouchez<sup>8</sup>,  
6 Odile Bulet-Schiltz<sup>1</sup>, Maria Conceição Ferreira Oliveira<sup>7</sup>, Stéphanie Ballereau<sup>3</sup>, Vania Bernardes-  
7 Génisson<sup>4</sup>, Valérie Maraval<sup>4</sup>, Patrick Calsou<sup>1,2</sup>, Stephan M. Hacker<sup>2</sup>, Yves Génisson<sup>3,†,\*</sup>, Remi  
8 Chauvin<sup>4,†,\*</sup>, Sébastien Britton<sup>1,6,\*</sup>

9 \* corresponding authors.      ¶, † equal contribution.

10 **AFFILIATIONS:**

11 1 Institut de Pharmacologie et de Biologie Structurale, IPBS, Université de Toulouse, CNRS, UPS,  
12 Toulouse, France.

13 2 Department of Chemistry, Technical University of Munich, Lichtenbergstrasse 4, 85748  
14 Garching, Germany

15 3 LSPCMIB, UMR5068, CNRS, Université de Toulouse, UPS, 118 route de Narbonne, 31062  
16 Toulouse, France.

17 4 LCC-CNRS, Université de Toulouse, CNRS, UPS, Toulouse, France.

18 5 INRAE, UR 875 Unité de Mathématique et Informatique Appliquées, Genotoul Bioinfo, Auzeville,  
19 CS 52627, 31326, Castanet-Tolosan, France.

20 6 Equipe labellisée la Ligue contre le Cancer 2018.

21 7 Department of Organic and Inorganic Chemistry, Science Center, Federal University of Ceará,  
22 Fortaleza-CE, 60455-970, Brazil.

23 8 INRAE, US 1426 GeT-PlaGe, F-31326, Castanet-Tolosan, France.

24

25 **ABSTRACT:**

26 Hundreds of cytotoxic natural or synthetic lipidic compounds contain chiral alkynylcarbinol  
27 motifs, but the mechanism of action of those potential therapeutic agents remains  
28 unknown. Using a genetic screen in haploid human cells, we discovered that the  
29 enantiospecific cytotoxicity of numerous terminal alkynylcarbinols, including the highly  
30 cytotoxic dialkynylcarbinols, involves a bioactivation by HSD17B11, a short-chain  
31 dehydrogenase/reductase (SDR) known to oxidize the C-17 carbinol center of androstan-  
32 3- $\alpha$ ,17- $\beta$ -diol to the corresponding ketone. A similar oxidation of dialkynylcarbinols  
33 generates dialkynylketones, that we characterize as highly protein-reactive electrophiles.  
34 We established that, once bioactivated in cells, the dialkynylcarbinols covalently modify  
35 several proteins involved in protein-quality control mechanisms, resulting in their  
36 lipoxidation on cysteines and lysines through *Michael* addition. For some proteins, this  
37 triggers their association to cellular membranes and results in endoplasmic reticulum  
38 stress, unfolded protein response activation, ubiquitin-proteasome system inhibition and  
39 cell death by apoptosis. Finally, as a proof-of-concept, we show that generic lipidic  
40 alkynylcarbinols can be devised to be bioactivated by other SDRs, including human  
41 RDH11 and HPGD/15-PGDH. Given that the SDR superfamily is one of the largest and  
42 most ubiquitous, this unique cytotoxic mechanism-of-action could be widely exploited to  
43 treat diseases, in particular cancer, through the design of tailored prodrugs.

## 44 MAIN TEXT

### 45 Introduction

46 Nature is a rich source of bioactive compounds, some of which can be directly exploited to treat  
47 diseases. Some of them reveal sophisticated mechanisms of action which can be mimicked by  
48 designing synthetic molecules with specific features (1). Marine sponges have attracted  
49 pharmaceutical interest since the discovery in the 1950s of C-nucleosides in *Cryptotethia crypta*  
50 that led to the development of cytosine arabinoside (ara-C or cytarabine) and analogues as  
51 anticancer treatments for acute myelogenous leukemia (2,3). In a different structural series,  
52 several cytotoxic acetylenic lipids bearing a terminal alkenylalkynylcarbinol (AAC) pharmacophore  
53 have since been isolated from marine sponges, such as petrocortyne A (**Supplementary Figure**  
54 **1**), isolated from *Petrosia sp.* (4) and fulvinol isolated from *Haliclona fulva* (5). The simplest  
55 cytotoxic AAC representative, (S)-eicos-(4E)-en-1-yn-3-ol ((S)-**1**, **Supplementary Figure 1**), was  
56 isolated from the marine sponge *Cribrochalina vasculum* (6). It demonstrated high cytotoxic  
57 activity selectively towards non-small cell lung carcinoma cells as compared to normal lung  
58 fibroblasts (7). Starting from (S)-**1**, an extensive structure-activity relationship study in human  
59 cancer cell lines established that (**Supplementary Figure 1**): i) the non-natural enantiomer (R)-**1**  
60 has higher cytotoxic activity, ii) homologues with shorter lipidic tails are more cytotoxic, with an  
61 optimum total aliphatic backbone of 17 carbon atoms (e.g. (R)-**2**), and iii) replacement of the  
62 internal C=C bond by a C≡C bond, giving rise to a terminal dialkynylcarbinol (DAC)  
63 pharmacophore, further increases cytotoxicity, to reach an IC<sub>50</sub> down to 90 nM for the DAC (S)-**3**  
64 (8-10). However, despite this significant level of activity, the mode of action of this family of  
65 molecules, including the natural compound (S)-**1**, remains elusive (7).

66 Here we use functional genomics and chemoproteomics to decipher how cytotoxic DACs and  
67 related molecules mediate their biological effect. We discover that they behave as prodrugs  
68 enantiospecifically bioactivated by a member of the Short-chain Dehydrogenase/Reductase

69 (SDR) family. Finally, we design new SDR-bioactivated DACs derivatives, establishing this family  
70 of lipidic alkynylcarbinols as a large and untapped reservoir of cytotoxic prodrugs.

71

## 72 **Results**

73 **The SDR HSD17B11 governs (S)-DACs cytotoxicity.** To determine how cytotoxic DACs  
74 mediate their effect on human cells, we applied a genetic approach using the pseudo-haploid  
75 human cell line HAP-1 (11). Given that (S)-**3** had the greatest cytotoxic activity of all the DACs  
76 previously tested (8-10), we screened for mutations that could render HAP-1 cells resistant to (S)-  
77 **3**. We first confirmed in HAP-1 that (S)-**3**, but not (R)-**3** (**Figure 1A**), exhibits nanomolar cytotoxic  
78 activity (**Figure 1B**, IC<sub>50</sub> 62.4 nM), in agreement with previous results on HCT116 colon cancer  
79 cells (8). We used Ethyl-Methane Sulfonate (EMS) to generate a mutagenized HAP-1 population  
80 and selected resistant clones using a lethal 250 nM (S)-**3** concentration. Ten individual (S)-**3**-  
81 resistant clones (DACR) were isolated, displaying a 38- to 62-fold resistance to (S)-**3** (**Figure 1C**)  
82 but similar sensitivity as parental cells to two unrelated compounds, bortezomib and doxorubicin  
83 (**Supplementary Figure 2A,B**). Based on previous work (12,13), and considering that EMS  
84 induces mainly point mutations under these conditions (14), we selected four DACR clones for  
85 RNA-seq analysis, to identify mis- or non-sense mutations accounting for the resistance. Around  
86 nine mutated genes were identified per clone (**Supplementary Figure 2C**), with *KCTD5* and  
87 *HSD17B11* being the only mutated genes shared by more than two clones (**Supplementary**  
88 **Figure 2D**). *KCTD5* encodes for an E3-ubiquitin ligase substrate adaptor identified in a genetic  
89 screen as a negative regulator of the Akt pathway (15). However, while *KCTD5* mRNA was  
90 expressed in all DACR clones, *HSD17B11* mRNA levels were strongly reduced in the only clone  
91 without *HSD17B11* coding mutations (#A5, **Supplementary Figure 2E**). This suggested that  
92 mutations or lack of expression of *HSD17B11* were responsible for DACR clone resistance. To  
93 confirm this, we sequenced *HSD17B11* cDNAs from six other DACR clones, and detected non-

94 synonymous *HSD17B11* mutations in five, and no *HSD17B11* cDNA in the sixth, suggesting loss  
95 of expression (**Figure 1D,E**). These data strongly supported a role for *HSD17B11* in mediating  
96 (*S*)-**3** cytotoxicity.

97 *HSD17B11* encodes for the estradiol 17-beta-dehydrogenase 11, a member of the SDR super-  
98 family. *HSD17B11*, also called SDR16C2, PAN1B, DHRS8 or retSDR2, localizes to the  
99 endoplasmic reticulum (ER) and lipid droplets (LD) via a N-terminal targeting domain (**Figure 1E**),  
100 where it uses NAD<sup>+</sup> to catalyze oxidation of the C17 carbinol center of androstan-3-alpha,17-beta-  
101 diol to generate androsterone (16,17) (see **Figure 2A**). The *HSD17B11* protein was barely  
102 detectable in all the DACR clones (**Figure 1F**, lower band), suggesting that the mutations result  
103 in protein instability. Using the DACR#A5 clone, in which *HSD17B11* RNA was strongly down-  
104 regulated (~200 fold, **Supplementary Figure 2E**), we performed complementation experiments  
105 with plasmids coding for GFP alone, or wild-type (WT) or S172L *HSD17B11*-GFP. This mutation  
106 was selected because the S172 residue is critical for catalysis (18), and the DACR#A4 clone,  
107 which carried S172L mutations, was the only one in which traces of full length *HSD17B11* could  
108 be detected (**Figure 1F**). Complemented DACR#A5 cells stably expressing WT and S172L  
109 *HSD17B11*-GFP at similar levels were successfully isolated (**Figure 1G**), and (*S*)-**3** was ~50 times  
110 more active against cells expressing WT *HSD17B11* compared to control GFP-complemented  
111 cells or cells expressing S172L *HSD17B11* (**Figure 1H**). This supports that *HSD17B11* catalytic  
112 activity is critical for (*S*)-DAC cytotoxicity. Notably, the DACR#A4 clone (S172L mutation) was also  
113 resistant to six other cytotoxic AACs: the naturally occurring AAC (*S*)-**1** (**Supplementary Figure**  
114 **3A**), its synthetic enantiomer (*R*)-**1**, its shorter homologue (*R*)-**2**, the synthetic AAC (*S*)-**4** with an  
115 internal C≡C bond and an external C=C bond (**Supplementary Figure 3B**), the  
116 allenylalkynylcarbinol (AllAC) (*R,S<sub>a</sub>*)-**5** (19) and the more cytotoxic butadiynylalkynylcarbinol  
117 (BAC) (*S*)-**6** (20) (**Supplementary Figure 3C**). Thus, *HSD17B11* functionality governs the  
118 enantiospecific cytotoxicity of the natural compound (*S*)-**1** but also of all the more cytotoxic

119 synthetic derivatives tested. In addition, HSD17B11 has been recently identified as mediating,  
120 through an unknown mechanism, the cytotoxic effect of dehydrofalcarinol, a polyacetylenic  
121 compound with a terminal butadiynylalkenylcarbinol motif isolated from several plants of the  
122 *Asteraceae* family (21).

123 We next tested the cytotoxic activity of (S)-**3** on a panel of 15 cancer cell lines. This revealed that  
124 the osteosarcoma U2OS cell line was the most sensitive to (S)-**3** while the breast cancer cell line  
125 T47D was highly resistant (**Supplementary Figure 4A**). In agreement, HSD17B11 protein was  
126 undetectable in T47D, while U2OS displayed the highest levels (**Supplementary Figure 4B**), in  
127 agreement with reported mRNA levels (*The Cancer Cell Line Encyclopedia dataset* (22)). In  
128 addition, (S)-**3** was particularly cytotoxic toward four other osteosarcoma cell lines as compared  
129 to normal cell lines or primary osteoblasts (**Supplementary Figure 4C**), suggesting that DACs  
130 could prove useful to treat this type of cancer. CRISPR/Cas9-mediated inactivation of HSD17B11  
131 also conferred significant (S)-**3** resistance to U2OS cells, which was suppressed by wild-type  
132 HSD17B11-GFP but not by the S172L mutant or GFP alone (**Supplementary Figure 5A,B**). This  
133 was further confirmed using two different small-interfering RNAs (siRNA) to down-regulate  
134 HSD17B11 in U2OS (**Supplementary Figure 5C,D**) and in the non-small cell lung carcinoma cell  
135 line A549, in which CRISPR/Cas9-mediated HSD17B11 inactivation also conferred (S)-**3**  
136 resistance (**Supplementary Figure 5E,F**). Altogether, these data establish that HSD17B11 is  
137 critical in multiple cell lines for (S)-**3** cytotoxic activity, and suggest that (S)-**3** behaves as an  
138 HSD17B11-bioactivated prodrug. In addition, the acute toxicity of (S)-**3** towards osteosarcoma cell  
139 lines indicates that DACs could be developed into a targeted anti-cancer therapy.

140 **Dialkynylketones are protein-reactive species.** We next investigated the downstream  
141 mechanism of cytotoxic action of the DAC (S)-**3**. The C17 carbinol center of androstan-3- $\alpha$ ,17-  
142 beta-diol, which is naturally oxidized by HSD17B11 (**Figure 2A** (16)), has the same spatial  
143 orientation as the (S)-**3** carbinol when its lipidic chain is superimposed with the C13(C18) side of

144 the steroid skeleton (**Figure 2B**). This suggested that HSD17B11 enantiospecifically recognizes  
145 and oxidizes (*S*)-**3** into a “dialkynylketone” **7** (DACone), a diyne that could be the cytotoxic  
146 species. However, when the DACone **7** was previously synthesized and tested, no cytotoxic  
147 activity was found (9). Given the high *in vitro* electrophilic reactivity of ynones as *Michael* acceptors  
148 of thiols and amines (23), we considered that medium components such as serum albumin may  
149 rapidly react with and inactivate DACones. To test this, we synthesized the DACone **7**, as well as  
150 a homologue with a shorter alkyl chain **8**, and treated U2OS cells in a protein-free medium (PBS  
151 containing CaCl<sub>2</sub> and MgCl<sub>2</sub> to maintain cellular adhesion). Both the DACones **7** and **8** were indeed  
152 cytotoxic in the absence of serum, with **8** (short chain) being even more active than (*S*)-**3** (**Figure**  
153 **2C**). While the cytotoxicity of (*S*)-**3** was strongly reduced by inactivation of HSD17B11, the  
154 cytotoxicity of the DACones **7** and **8** was not affected, supporting the notion that the DACones are  
155 the cytotoxic products generated from DACs by HSD17B11.

156 To further analyze the interaction between DACones and proteins, we used copper-mediated  
157 azide-alkyne cycloaddition (CuAAC “click chemistry”), which can be used to monitor what happens  
158 to drugs in various biological environments, including inside cells (24,25). We synthesized  
159 “clickable” analogues, i.e. bearing a terminal C≡CH tag, for each DAC enantiomer ((*S*)-**9** and (*R*)-  
160 **9**), and for long and short DACones (**10** and **11**, **Figure 2B**), and used them to monitor the  
161 formation of covalent bonds between DACones and serum proteins. The clickable DACone **10**, or  
162 clickable DAC (*S*)-**9** as control, were incubated with fetal bovine serum (FBS) or purified bovine  
163 serum albumin (BSA), followed by CuAAC-mediated ligation of an AlexaFluor647-azido  
164 fluorophore to the free C≡CH tag. The proteins were separated by SDS-PAGE and scanned for  
165 fluorescence (26). Covalent adducts were formed on BSA with DACone **10** but not with (*S*)-**9**  
166 (**Figure 2D**). Moreover, the DACone **10** also reacted with several other model proteins, including  
167 the bovine beta-lactoglobuline (BLG) (**Supplementary Figure 6A**). Using BSA and BLG, we  
168 established that DACone adducts are produced only when using the clickable DACones **10** or **11**

169 (**Figure 2E**), suggesting that the terminal triple bond of the DACone pharmacophore is modified  
170 or masked after reaction. Finally, we could recapitulate the activation of (*S*)-**9**, but not of (*R*)-**9**, into  
171 protein-reactive species by immunopurified WT HSD17B11, but not by the S172L mutant (**Figure**  
172 **2F**). This further supports an enantio-selective bioactivation of (*S*)-**9** into the DACone **10** by  
173 HSD17B11.

174 **Reaction of DACones with proteins.** To further decipher the reaction of DACones with proteins,  
175 we used direct-infusion mass spectrometry to analyze BLG modified with the clickable DACone  
176 **10**. Purified BLG contains two isoforms (A and B, differing by 86.0 Da) and, when incubated in a  
177 1:3 molar ratio with DACone, both BLG isoforms were completely modified with the formation of  
178 one or two adducts of ~+242 Da (**Figure 2G**), which corresponds to the mass of the clickable  
179 DACone **10**. Monitoring the absorbance spectra of modified BLG revealed that BLG gains an  
180 absorption band at ~323 nm upon modification by DACone (**Supplementary Figure 6B**). Using  
181 this, we confirmed that both BLG and BSA are modified by the DACones **7** and **8** or their clickable  
182 analogues **10** and **11** (**Supplementary Figure 6B,C**). The shorter DACone **8** proved even more  
183 reactive, in line with its greater cytotoxicity (**Figure 2C, Supplementary Figure 6B,C**). Next, we  
184 assessed the selectivity of DACones towards amino acid residues in the whole proteome in an  
185 unbiased fashion. For this purpose, we incubated the DACones **10** and **11** with U2OS total cell  
186 extracts in PBS. We then used residue-specific chemoproteomics with isotopically labelled  
187 desthiobiotin azide (isoDTB) tags (27-29) coupled to a novel MSFragger-based FragPipe  
188 computational platform (30) to detect the modified amino acids on the enriched peptides. This  
189 revealed that both DACones reacted with cysteine and lysine side chains, with the expected  
190 modification being detected (**Figure 2H, Supplementary Figure 6D,E,F, Supplementary File 1**).  
191 As we also detected many unmodified peptides, we cannot exclude that other amino acids are  
192 also modified by the probe but that their modification is lost during the workflow. We next confirmed  
193 the reactivity of DACones with cysteine and lysine side chains by monitoring the appearance of



194 the ~323 nm absorbance band after reaction of the DACone **8** with isolated amino acids, using *N*-  
195 acetylated versions to prevent reactions with the N-terminal amino group. At neutral pH, DACones  
196 only reacted with *N*-acetyl-L-cysteine (NAC) but not with *N*<sub>α</sub>-acetyl-L-lysine (NAK)  
197 (**Supplementary Figure 6G**, left spectrum), whereas at higher pH they reacted with both NAC  
198 and NAK (**Supplementary Figure 6G**, right spectrum), in agreement with the nucleophilic  
199 reactivity of the non-protonated ε-NH<sub>2</sub> group of the lysine chain. No reaction was observed with  
200 *N*-acetyl glycine (NAG), supporting that the reaction involves the side chain. The reaction with  
201 lysine side chains is compatible with the *pK<sub>a</sub>* value for the lysine ε-amino group that can be as low  
202 as ~5 in hydrophobic domains in proteins (31). In agreement, analysis of the sequence context of  
203 the amino acids identified as modified by the DACone **10** revealed an enrichment of hydrophobic  
204 amino acids around the modified lysines, which was not observed for the modified cysteines  
205 (**Supplementary Figure 7A,B, Supplementary File 2**). Using nuclear magnetic resonance  
206 (NMR), we characterized the products of the reaction of the short DACone **8** with NAC  
207 (**Supplementary Figure 8A,B**) or NAK (**Supplementary Figure 8C,D**). This revealed that a  
208 covalent bond forms by addition of the thiol (NAC) or amino (NAK) group onto the terminal alkyne  
209 of the DACone head (**Supplementary Figure 8E**) and suggests a similar reaction with proteins  
210 (**Figure 2I**). The donor-acceptor extension of π-electron delocalization in the enone adducts (S-  
211 CH=CH-C=O for NAC, N-CH=CH-C=O for NAK) accounts for the additional absorption band  
212 observed for the DACone adducts with *N*-acetyl amino acids. Altogether, our data show that  
213 DACones are highly reactive with proteins *in vitro*.

214 **Bioactivated (S)-DACs lipoxidize multiple proteins in cells.** Protein modification by lipidic  
215 DACs equates to their lipoxidation (a term used to designate the covalent modification of a protein  
216 by a reactive lipid (32)) by one or several C17 hydrophobic chain(s). Considering that protein  
217 palmitoylation (addition of a C16 lipidic chain) can trigger membrane tethering of proteins, we  
218 hypothesized that lipoxidation by DACs could affect protein localization and/or function and

219 account for the cytotoxicity of bioactivated DACs in cells as described for other reactive lipids (32).  
220 To challenge this hypothesis in cells, we took advantage of the clickable DAC **9** (33) (**Figure 2B**).  
221 As observed for the DAC **3**, the cytotoxicity of the clickable DAC **9** was enantiospecific, biased  
222 towards (*S*)-**9**, and dependent on bioactivation by HSD17B11 (**Supplementary Figure 9A**). Cells  
223 were treated with clickable (*S*)- or (*R*)-**9** DACs, extracts prepared and click chemistry used to  
224 detect the covalent adducts of DACs onto proteins (26). Multiple modified proteins were detected  
225 in extracts from (*S*)-**9**-treated cells, while no adduct with (*R*)-**9** was detected (**Figure 3A**).

226 To identify the proteins lipoxidized by DACs upon bioactivation, and inspired by previous studies  
227 (34,35), we used streptavidin pull-down to isolate (*S*)-**9**-modified proteins after click chemistry-  
228 mediated ligation of a biotin handle in extracts of treated cells and identified them using bottom-  
229 up proteomics. 42 proteins were significantly enriched more than 2-fold in the (*S*)-**9** condition as  
230 compared to (*R*)-**9** (**Figure 3B, Supplementary File 3**), with three proteins being enriched more  
231 than 60-fold: BRAT1, PLIN3 and PSMD2. To validate the three main hits, we overexpressed  
232 BRAT1, PSMD2 and PLIN3 individually (in addition to TK1) as GFP fusions in U2OS cells  
233 (**Supplementary Figure 9B**), and used GFP pull-down to determine whether they were modified  
234 by clickable DAC **9** in cells. These proteins were found robustly modified by (*S*)-**9** but not by (*R*)-  
235 **9**, especially BRAT1 and PSMD2, while GFP alone was not modified (**Supplementary Figure**  
236 **9C**).

237 Among the three main hits, PSMD2 drew our attention as an essential protein in HAP-1 cells (36).  
238 PSMD2, also called Rpn1, is a critical non-catalytic subunit of the 19S regulatory particle of the  
239 26S proteasome, a large complex responsible for the ubiquitin-dependent degradation of cellular  
240 proteins. PSMD2 is essential for 19S assembly and for docking of ubiquitin, ubiquitin receptors  
241 and the deubiquitinase USP14 (37). Immunoprecipitation of endogenous PSMD2 from U2OS cells  
242 treated with clickable DAC confirmed that PSMD2 is covalently modified after treatment with the  
243 DAC (*S*)-**9** but not with (*R*)-**9** (**Figure 3C**). Moreover, the clickable DACone **10** efficiently modified

244 PSMD2 *in vitro* (**Supplementary Figure 9D**). Using the (S)-DAC-resistant HAP-1 clones A1 and  
245 A4 (expressing V16D and S172L HSD17B11 mutants, respectively), we also confirmed that the  
246 modification of cellular proteins by (S)-**9**, including PSMD2, was dependent on HSD17B11 (**Figure**  
247 **3D** and **Supplementary Figure 9E**). Our proteomics approach also revealed that, in addition to  
248 PSMD2, a cluster of proteins involved in protein quality control (PQC) was also modified by the  
249 DAC (S)-**9** (**Figure 3B**), including several protein disulfide isomerases (PDIA1/P4HB, PDIA6 and  
250 TMX1), thioredoxin reductases (TXNDC5 and TXNRD1) and protein chaperones (the ER-resident  
251 HSP70, HSPA5/GRP78/BiP; and HSP90AB1), the alteration of which likely also contributes to the  
252 DAC cytotoxic effect. Altogether, these data show that (S)-DACs are bioactivated by HSD7B11  
253 into highly reactive DACones that covalently lipoxidize nearby proteins, including essential  
254 proteins involved in PQC such as PSMD2, a critical subunit of the ubiquitin-proteasome system  
255 (UPS).

256 We then used click-based imaging to monitor the localization of DAC-modified proteins. (S)-**9** gave  
257 a strong nuclear and cytoplasmic staining, the latter being evocative of ER and mitochondrial  
258 membranes (**Figure 3E**). In agreement, we observed a co-occurrence of (S)-**9**-click staining with  
259 markers of ER (**Supplementary Figure 10A**) and mitochondria (**Supplementary Figure 10B,C**).  
260 The lack of staining in cells treated with the inactive (R)-**9** (**Figure 3E**) supported that the staining  
261 corresponds to DAC-modified proteins. No staining was observed with (S)-**3**, supporting that the -  
262 C≡CH group of the dialkynylcarbinol head is modified after bioactivation and subsequent reaction  
263 with proteins (as shown in **Figure 2I**). Since GFP-BRAT1 is the protein that was the most robustly  
264 modified by DACs in cells (**Supplementary Figure 9C**), we pre-extracted soluble proteins with  
265 mild nonionic detergent to assess GFP-BRAT1 association to subcellular compartments. Under  
266 these conditions, most GFP-BRAT1 was removed by the pre-extraction in untreated cells, as  
267 expected for a soluble protein, while it was retained to subcellular compartments evocative of ER  
268 and nucleus after treatment with (S)-**3** (**Figure 3F**). These data suggest that protein lipoxidation

269 by bioactivated DACs results, at least for some of them, into their relocalization to cellular  
270 membranes.

271 **(S)-DACs trigger ER-stress, inhibition of ubiquitin-proteasome system (UPS) and**  
272 **apoptosis.** In agreement with (S)-DAC impairing PQC, we observed that treatment of cells by (S)-  
273 **3** triggers ER swelling as shown by the appearance of a large cytoplasmic vacuole between 4 and  
274 8 h of treatment that preceded cell death (**Figure 4A**). The use of a GFP variant targeted and  
275 retained into the ER confirmed that these vacuoles derived from this compartment (**Figure 4B**),  
276 while a mCherry protein addressed to mitochondria in the same cells showed that (S)-DAC  
277 treatment concomitantly triggered mitochondrial fission, a hallmark of cell stress (**Supplementary**  
278 **Figure 11**, see also **Supplementary movie 1**). ER swelling is a feature of ER-stress, which can  
279 result from the accumulation of unfolded proteins within the ER and can be triggered by various  
280 defects of PQC such as inhibition of the UPS, as seen with the UPS inhibitor MG132  
281 (**Supplementary Figure 12A**). In agreement with (S)-**3** cytotoxicity being mediated by the  
282 accumulation of unfolded proteins, vacuolization and cell death induced by (S)-**3** could be blocked  
283 by inhibition of protein synthesis by cycloheximide (CHX, **Supplementary Figure 12B**). (S)-**3** also  
284 triggered a strong accumulation of the chaperone HSP70 and of the cell stress response protein  
285 p21, similarly to MG132 (**Figure 4C**) or PSMD2 depletion using siRNA (**Supplementary Figure**  
286 **12C**). It is noteworthy that ER-stress itself can trigger UPS inhibition, likely through consuming  
287 free ubiquitin (38). In agreement with this hypothesis, we observed that (S)-**3** induces the  
288 accumulation of poly-ubiquitinated proteins (**Figure 4D**), a hallmark of UPS inhibition, and blocked  
289 the degradation of an artificial substrate of the UPS system in a manner similar to MG132 (**Figure**  
290 **4E,F**). Similarly to MG132, (S)-**3** also blocked the assembly of the protein 53BP1 into foci at sites  
291 of DNA double-strand breaks (**Supplementary Figure 12D**), a process that depends on the local  
292 *de novo* DNA damage-induced ubiquitination of histones (39), thereby confirming depletion of free  
293 ubiquitin by treatment with (S)-**3**. It is noteworthy that (S)-**3** treatment itself did not induce DNA

294 damage nor blocked ATM activation, an important component of the DNA damage response  
295 (**Supplementary Figure 12D**). Accumulation of unfolded proteins in the ER activates the Unfolded  
296 Protein Response (UPR) which helps maintain ER protein homeostasis by reducing the influx of  
297 proteins into the ER and by increasing the activity of ER protein quality control mechanisms. The  
298 UPR is initiated by the activation of three signal transducers: IRE1 $\alpha$ , PERK and ATF6, each  
299 controlling a specific aspect of the UPR (40). IRE1 $\alpha$  is a ER-resident transmembrane protein, the  
300 activation of which results from its homodimerization mediated by its luminal domain, which is  
301 controlled by ER-resident chaperones including HSPA5/GRP78/BiP. IRE1 $\alpha$  activation triggers its  
302 autophosphorylation, which is used as a marker of UPR activation. In agreement with (S)-**3**  
303 triggering unfolded proteins accumulation and UPR activation, we observed that treatment with  
304 (S)-**3** induced the rapid autophosphorylation of IRE1 $\alpha$ , preceding the accumulation of cytoplasmic  
305 HSP70 (**Figure 4G**). Ultimately, (S)-**3** treatment resulted in apoptosis, as marked by PARP-1  
306 cleavage (**Figure 4G**), in a caspase inhibitor (z-VAD-fmk)-sensitive manner (**Figure 4H**). Caspase  
307 inhibition blocked cell death but not the vacuolization process (**Supplementary Figure 12E**).  
308 Altogether, these results show that (S)-**3**, once bioactivated by HSD17B11, covalently modifies  
309 multiple proteins including critical components of the PQC, resulting in ER-stress, inhibition of the  
310 UPS and activation of the UPR, ultimately resulting in apoptotic cell death.

311 **Identification of new SDR-specific prodrugs.** Our discovery that an SDR, HSD17B11,  
312 bioactivates a secondary alcohol prodrug by oxidation into the corresponding ketone is particularly  
313 interesting given that the SDR superfamily is one of the largest protein superfamilies, with over  
314 500,000 members found in most forms of life. This means that this mechanism of prodrug  
315 activation could be exploited to develop an extensive range of new drugs and compounds to kill  
316 cells or organisms expressing specific SDRs with high selectivity. SDRs use NAD(H) or NADP(H)  
317 cofactors to perform oxidoreductase, lyase or isomerase activities on a large variety of substrates  
318 including steroids, retinoic acids, lipids, polyols, sugars, nucleotides and xenobiotics (41). *In vitro*,

319 SDR enzymes can frequently catalyze both oxidation and reduction, depending on the supplied  
320 co-factor. In cells, however, they show directionality, which depends on their sub-cellular  
321 localization and cofactor availability. We first determined whether other SDRs with the proper *in*  
322 *cellulo* directional polarity could activate other secondary alkynylcarbinol-containing compounds  
323 into cytotoxic species. We found that the AAC (S)-**4** (with a terminal C=CH<sub>2</sub> group, **Figure 5A**),  
324 despite its activity being strongly reduced in DAC-resistant clone A4 (~17 fold, **Supplementary**  
325 **Figure 3B**), still retained some cytotoxicity (IC<sub>50</sub> ~2.6 μM) on these cells, possibly through  
326 bioactivation by a second dehydrogenase. To identify such a dehydrogenase, EMS was used to  
327 mutagenize the DACR clone #A4 once again. This mutagenized population was selected with a  
328 lethal concentration of 10 μM (S)-**4** and over twenty resistant clones (AACR clones) were isolated.  
329 Among those, we selected seven, which all showed similar increased resistance to (S)-**4** (**Figure**  
330 **5A**), and submitted them to RNA-seq analysis. This allowed the identification of an average of six  
331 coding mutations in each clone (**Supplementary Figure 13A**), and analysis revealed that the  
332 *RDH11* gene carried point mutations in five of these seven clones (**Supplementary Figure**  
333 **13A,B**). Further analysis revealed that the clone A6 contained two alleles of *RDH11*, each with a  
334 different point mutation (**Figure 5B**), and *RDH11* expression was severely downregulated in the  
335 clone B4 (**Supplementary Figure 13C**). In conclusion, the *RDH11* gene was mutated (**Figure 5C**)  
336 or downregulated in all the AACR clones, implicating it as an SDR, with similar prodrug  
337 bioactivation capacity as HSD17B11, that mediates AAC (S)-**4** toxicity.

338 The human *RDH11* gene codes for retinol dehydrogenase 11 (also called PSDR1 or SDR7C1), a  
339 member of the SDR superfamily which also localizes to the ER (42) where it uses NADP<sup>+</sup> to  
340 catalyze the conversion of retinol (**Figure 5D**, preferentially the 11-*cis*, all-*trans* and 9-*cis* isomers)  
341 into retinal through oxidation of the C-15 carbinol center, with a pro-*R* hydrogen specificity(43).  
342 Full-length RDH11 protein was not detectable in any of the AACR clones, suggesting that all the  
343 identified mis-sense mutations decrease RDH11 stability (**Figure 5E**). To validate the ability of

344 RDH11 to mediate some of the (S)-**4** cytotoxic effects, we compared its activity on U2OS, U2OS  
345 KO HSD17B11 and U2OS KO HSD17B11 cells in which RDH11 was inactivated using  
346 CRISPR/Cas9 (**Supplementary Figure 14A**). In this panel, we confirmed that, while HSD17B11  
347 was responsible for the nM activity of the AAC (S)-**4** (48-fold IC<sub>50</sub> increase as a result of HSD17B11  
348 inactivation), the remaining toxicity of (S)-**4** in HSD17B11 KO cells was further decreased by  
349 inactivating RDH11 (6-fold IC<sub>50</sub> increase by RDH11 inactivation, **Supplementary Figure 14B**).  
350 Comparison of the activity of (S)-**3** and (S)-**4** on U2OS KO [HSD17B11+RDH11] complemented  
351 either by HSD17B11-GFP or RDH11 (**Supplementary Figure 14C**) revealed that RDH11  
352 bioactivates preferentially (S)-**4** (IC<sub>50</sub>~0.28 μM, with a terminal C=CH<sub>2</sub> group) over (S)-**3** (IC<sub>50</sub>~1.92  
353 μM, with a terminal C≡CH group, **Supplementary Figure 14D**), but also established that  
354 HSD17B11 was much more efficient than RDH11 for the bioactivation of either molecule (IC<sub>50</sub> <  
355 40 nM).

356 As a proof-of-principle of the potential value of these discoveries for designing novel prodrugs with  
357 controlled cytotoxic activity, we attempted to design a new prodrug whose cytotoxic effects would  
358 depend more on the RDH11 SDR. We used WT U2OS or U2OS inactivated for HSD17B11,  
359 RDH11 or both (**Figure 5F**) to test several AAC analogues. Introduction of a second secondary  
360 carbinol function in the AAC structure, generating the AlkenylAlkynylDiCarbinol **12** (AADC),  
361 reduced its bioactivation by HSD17B11, while leaving intact its RDH11-dependent activation and  
362 thereby generating a new prodrug equally bioactivated by HSD17B11 and RDH11 (**Figure 5G**).  
363 As mixtures of diastereoisomers were used for this experiment, lower IC<sub>50</sub> can be expected with  
364 selected AADC enantiomers, especially with the external carbinol center in the RDH11-preferred  
365 (S) configuration.

366 Another SDR, HPGD, also called 15-PGDH, PGDH1 or SDR36C1, is responsible for the  
367 inactivation of prostaglandins through oxidation of the (S)-C-15 carbinol center in a NAD<sup>+</sup>-  
368 dependent manner (**Figure 5H**) (44). HPGD expression is tissue-restricted (prostate and bladder)



369 and null in U2OS cells (*Broad Institute Cancer Cell Line Encyclopedia* RNA-seq dataset). To  
370 determine whether this SDR could also bioactivate potential prodrugs, we used U2OS inactivated  
371 for HSD17B11 and overexpressing GFP alone or HPGD-GFP (**Figure 5I**), and screened a small  
372 collection of lipidic alkynylcarbinols. We found that the AIAC (*S,S<sub>a</sub>*)-**5** was selectively bioactivated  
373 by HPGD, resulting in an IC<sub>50</sub> of ~147 nM in HPGD-overexpressing cells vs normal U2OS (**Figure**  
374 **5J**). Thus, this mechanism of action is likely a general property of SDRs that could be exploited to  
375 develop a wide range of tailored prodrugs to cause selective cytotoxicity.

376

## 377 **Discussion**

378 Through a powerful framework (13) (see **Supplementary Note 1**), our study reveals the original  
379 mode of action of a large family of natural and synthetic cytotoxic lipids characterized by a chiral  
380 terminal functional alkynylcarbinol pharmacophore. We show that these molecules are oxidized in  
381 an enantiospecific manner by a specific SDR, HSD17B11, converting them into an alkynylketone  
382 species (ynones). Oxidation of DACs produces dialkynylketones (DACones) that proved to be  
383 highly protein-reactive electrophiles, forming *Michael* adducts with cysteines and lysines.  
384 Consequently, bioactivated DACs modify several proteins in cells, resulting in their lipoxidation by  
385 a C17 lipidic chain. Lipoxidation of a protein can modify its solubility, folding, interactions, activity  
386 and/or localization (32). In agreement, DAC treatment triggers the association of BRAT1, one of  
387 the most DAC-modified proteins, to ER and nuclear membranes (**Figure 3F**). Covalent  
388 modification of BRAT1 by the natural diterpene curcusone D was recently reported and resulted  
389 in BRAT1 degradation and reduced DNA damage response (45). Regarding (*S*)-DAC, in addition  
390 to BRAT1, multiple proteins involved in mechanisms of PQC are also lipoxidized. Considering that  
391 lipoxidation of a single protein can inhibit the UPS (46), the simultaneous modification of several  
392 critical actors of PQC is likely to result in an acute proteotoxic stress. In agreement with the general  
393 effects of protein lipoxidation, DAC treatment triggers ER-stress and inhibition of the UPS (each



394 one fueling the other) (38). This leads to the early activation of the UPR marked by IRE1 $\alpha$   
395 autophosphorylation. In addition to unfolded proteins accumulation, UPR activation could also be  
396 the result of HSPA5/GRP78/BiP lipoxidation and/or tethering of multiple proteins to ER  
397 membranes. Finally, (S)-DACs also quickly induce mitochondrial fission and caspase-dependent  
398 apoptosis (**Figure 6**). Of note, hundreds of known cytotoxic natural compounds have one or  
399 several alkynylcarbinol motifs. The mechanism of action identified here could thus be shared in its  
400 principles (enantiospecific bioactivation into protein-reactive lipids) by these cytotoxic molecules  
401 (see **Supplementary Note 2**).

402 Our work also provides a proof-of-concept that new pro-cytotoxic agents can be designed to be  
403 bioactivated through an enantiospecific oxidation catalyzed by selected SDRs. We exemplified  
404 this with three different human dehydrogenases, HSD17B11, RDH11 and HPGD (**Figure 6**). We  
405 also show here that multiple human cell lines derived from osteosarcoma, a rare pediatric cancer,  
406 were particularly sensitive to (S)-DACs (**Supplementary Figure 4C**), suggesting that HSD17B11-  
407 and more generally SDR-bioactivated prodrugs could find anticancer applications, especially  
408 considering that 71 different SDRs are found in humans (47). For example, HSD3B1-specific pro-  
409 drugs could prove useful to treat castration-resistant prostate cancers, since the stabilized N367T  
410 variant of this SDR, found in ~30 % of the population ([rs1047303](#)), has been associated to  
411 resistance to androgen deprivation therapies by allowing self-sufficient production of pro-  
412 proliferative androgens by prostate cancer cells (48-50).

413 Of note, another family of diyne molecules, the enediynes, are already used in anticancer  
414 treatments (see **Supplementary Note 3**). Beyond that, the SDR superfamily is one of the largest,  
415 with representatives in all known life forms, except viruses: 507 673 SDRs are currently identified  
416 in the Uniprot database (in 7546 species, Pfam ID: PF00106). A bioinformatic classification of  
417 SDRs has revealed that among the 314 SDR subfamilies identified (51), half are specific to  
418 bacteria. This offers the prospect of designing antibiotics with novel mechanisms of action.

419 Finally, our findings extend the toolbox of protein-reactive warheads with the identification of the  
420 DACone motif as a potent reactive group toward the thiol and amino groups of the side chains of  
421 cysteine and lysine, respectively. This reaction is quantitative, without co-product and operating  
422 in aqueous buffer at room temperature, making it well suited for many applications. In our study,  
423 multiple proteins could be functionalized by a terminal alkyne motif using clickable DACone **10** or  
424 **11** and the resulting linkage was found to be highly stable. The reactive species could also be  
425 readily produced *in situ* by using the appropriate SDR with its co-factor (see **Figure 2F**). Our  
426 unbiased study of the DACones reactivity using the isoDTB-ABPP approach (30) provides the first  
427 insights into the proteome-wide reactivity of these novel electrophiles. Reactive lysines have been  
428 mapped on functional domains of human proteins (52,53) and could be targeted through exploiting  
429 this new reactive entities supplied exogenously or generated *in situ*, thereby offering new avenues  
430 for protein functionalization or covalent inhibitors design.

## 431 Methods

432 **Plasmids.** Detailed information regarding the plasmids used and generated in this study are  
 433 provided in the table below. Plasmids generated in this study have been produced i) by ligating  
 434 annealed primers into BbsI digested plasmids (for cloning of sgRNAs) or ii) by ligating digested  
 435 PCR-amplified cDNAs into dephosphorylated plasmids. Phusion DNA polymerase, FastDigest  
 436 restriction enzymes and FastAP phosphatase were used (Thermo Fisher Scientific). For all  
 437 plasmids, DNA sequencing (Mix2Seq, Eurofins Genomics) was used with the specified primers,  
 438 to confirm that the desired sequence was inserted. All new plasmids have been deposited on  
 439 Addgene.

| Plasmid name                         | Template for PCR-based cloning           | Primers for PCR-based cloning, sequencing or oligonucleotides for annealing-based cloning                                               | Cloned in                                      | Cloning sites | Polymorphism | Addgene ID | Reference |
|--------------------------------------|------------------------------------------|-----------------------------------------------------------------------------------------------------------------------------------------|------------------------------------------------|---------------|--------------|------------|-----------|
| <b>ERmoxGFP</b>                      |                                          |                                                                                                                                         |                                                |               |              | 68072      | (54)      |
| <b>Ub-G76V-YFP</b>                   |                                          |                                                                                                                                         |                                                |               |              | 11949      | (38)      |
| <b>mCherry-Mito-7</b>                |                                          |                                                                                                                                         |                                                |               |              | 55102      | (55)      |
| <b>pEGFP-N1-ATG-FLAGC</b>            |                                          |                                                                                                                                         |                                                |               |              | 60360      | (56)      |
| <b>pEGFP-N1-HSD17B11-WT-FLAGC</b>    | RT-PCR from wild-type HAP-1              | RT: HSD17B11-RNA-Rv<br>HSD17B11-RNA-Fw<br>Cloning: HSD17B11-F-XhoI<br>HSD17B11-R-MluI<br>Sequencing: SEQ-HSD17B11-F1<br>SEQ-HSD17B11-R1 | pEGFP-N1-FLAGC, Addgene #60360 (56)            | XhoI+MluI     | rs6531985    | 161903     | This work |
| <b>pEGFP-N1-HSD17B11-S172L-FLAGC</b> | RT-PCR from DACR#A4 HAP-1                | HSD17B11-RNA-Rv for RT<br>HSD17B11-F-XhoI<br>HSD17B11-R-MluI                                                                            | pEGFP-N1-FLAGC, Addgene #60360 (56)            | XhoI+MluI     | rs6531985    | 161904     | This work |
| <b>pICE-EGFP-FLAG-PLIN3</b>          | IMAGE clone #3833411 (Source Bioscience) | Cloning: PLIN3-F-XhoI<br>PLIN3-R-NotI<br>Sequencing: SEQ-GFPC-F<br>SEQ-PLIN3-F<br>SEQ-BGH-R                                             | pICE-EGFP-FLAG-Ku70siR-WT; Addgene #46961 (57) | XhoI+NotI     |              | 161918     | This work |
| <b>pEGFP-C1-FLAG-BRAT1</b>           | IMAGE clone #3839985 (Source Bioscience) | Cloning: BRAT1-F-NotI<br>BRAT1-R-EcoRI<br>Sequencing: SEQ-GFPC-F<br>SEQ-BRAT1-F1<br>SEQ-BRAT1-F2<br>SEQ-SV40PA-R                        | pEGFP-C1-FLAGN; Addgene #46956 (57)            | NotI+EcoRI    |              | 161920     | This work |
| <b>pICE-EGFP-FLAG-PSMD2</b>          | IMAGE clone #2822191 (Source             | Cloning: PSMD2-F-XhoI<br>PSMD2-R-NotI<br>Sequencing:                                                                                    | pICE-EGFP-FLAG-Ku70siR-WT;                     | XhoI+NotI     |              | 161917     | This work |

|                                           |                                          |                                                                                                                       |                                                |              |            |        |           |
|-------------------------------------------|------------------------------------------|-----------------------------------------------------------------------------------------------------------------------|------------------------------------------------|--------------|------------|--------|-----------|
|                                           | Bioscience                               | SEQ-GFPC-F<br>SEQ-PSMD2-F1<br>SEQ-PSMD2-F3<br>SEQ-PSMD2-R1<br>SEQ-PSMD2-R2<br>SEQ-BGH-R                               | Addgene<br>#46961 (57)                         |              |            |        |           |
| <b>pICE-EGFP-FLAG-TK1</b>                 | IMAGE clone #2966331 (Source Bioscience) | Cloning: TK1-F-XhoI<br>TK1-R-NotI<br>Sequencing: SEQ-GFPC-F<br>SEQ-BGH-R                                              | pICE-EGFP-FLAG-Ku70siR-WT; Addgene #46961 (57) | XhoI+NotI    |            | 161919 | This work |
| <b>pEGFP-N1-HPGD-FLAGC</b>                | IMAGE clone #3638799 (Source Bioscience) | Cloning: HPGD-F-XhoI<br>HPGD-R-MluI<br>Sequencing: SEQ-CMV-F<br>SEQ-GFPN-R                                            | pEGFP-N1-FLAGC, Addgene #60360 (56)            | XhoI+MluI    |            | 161915 | This work |
| <b>pE-N1-RDH11</b>                        | RT PCR from wild-type HAP-1              | RT: RDH11-RNA-Rv<br>RDH11-RNA-Fw<br>Cloning: RDH11-F-HindIII<br>RDH11-R-NotI<br>Sequencing: SEQ-CMV-F<br>SEQ-SV40PA-R | pEGFP-N1-FLAGC, Addgene #60360 (56)            | HindIII+NotI | rs17854678 | 161916 | This work |
| <b>pCAG-eSpCas9-2A-GFP-sgRNA-HSD17B11</b> |                                          | Annealed primers : HSD17B11-sgRNA-S<br>HSD17B11-sgRNA-AS<br>Designed with Benchling<br>Sequencing : SEQ-U6-F          | pCAG-eSpCas9-2A-GFP, Addgene #79145            | BbsI         |            | 161923 | This work |
| <b>pCAG-eSpCas9-2A-GFP-sgRNA-RDH11</b>    |                                          | Annealed primers : RDH11-sgRNA-S<br>RDH11-sgRNA-AS<br>Designed with Benchling<br>Sequencing : SEQ-U6-F                | pCAG-eSpCas9-2A-GFP, Addgene #79145            | BbsI         |            | 161924 | This work |

440

441

442 **Oligonucleotides.** DNA oligonucleotides used in the study are described in the table below and

443 were ordered from Eurofins Genomics.

| ID                   | Sequence 5' to 3'               | Embedded restriction site |
|----------------------|---------------------------------|---------------------------|
| Plasmid sequencing   |                                 |                           |
| <b>SEQ-CMV-F</b>     | GTAGGCGTGTACGGTGGGAGG           |                           |
| <b>SEQ-BGH-R</b>     | TAGAAGGCACAGTCGAGG              |                           |
| <b>SEQ-GFPC-F</b>    | CATGGTCCTGCTGGAGTTCGTG          |                           |
| <b>SEQ-GFPN-R</b>    | CTCCTCGCCCTTGCTCACC             |                           |
| <b>SEQ-SV40PA-R</b>  | GCAAGTAAAACCTCTACAAATGTGGTATGG  |                           |
| <b>SEQ-U6-F</b>      | TGGACTATCATATGCTTACCG           |                           |
| BRAT1                |                                 |                           |
| <b>BRAT1-F-NotI</b>  | CGCGCGGCCGCATGGACCCAGAATGCGCCC  | NotI                      |
| <b>BRAT1-R-EcoRI</b> | CGCGAATTCTCAGTAGCAGTCGGCCTCGTCC | EcoRI                     |

|                   |                                          |         |
|-------------------|------------------------------------------|---------|
| SEQ-BRAT1-F1      | AGAGTCCTTGTGCTCCGCGG                     |         |
| SEQ-BRAT1-F2      | GCCCTGCCTCCAGTGTGG                       |         |
| HPGD              |                                          |         |
| HPGD-F-XhoI       | GGCCTCGAGCCACCATGCACGTGAACGGCAAAGTGG     | XhoI    |
| HPGD-R-MluI       | GGCACGCGTTTGGGTTTTGCTTGAATGG             | MluI    |
| HSD17B11          |                                          |         |
| HSD17B11-RNA-Fw   | ACACCAAACGCTCGCAGCC                      |         |
| HSD17B11-RNA-Rv   | CACTATTAGATGACATCAACCTAAACCTG            |         |
| SEQ-HSD17B11-F1   | GAAGGTGAAGGCAGAAATTGGAG                  |         |
| SEQ-HSD17B11-R1   | ACATGTCCAGCTGCCGAAGC                     |         |
| HSD17B11-F-XhoI   | CCGCTCGAGCCACCATGAAATTTCTTCTGGACATCCTCC  | XhoI    |
| HSD17B11-R-MluI   | CCGACGCGTTTGGCCTTTTCATTTTATATCCAATAACTGC | MluI    |
| HSD17B11-sgRNA-S  | CACCGTGTAAATCAGCACGATTTTCGC              |         |
| HSD17B11-sgRNA-AS | AAACGCGAAATCGTGCTGATTACAC                |         |
| PLIN3             |                                          |         |
| PLIN3-F-XhoI      | GCGCTCGAGTCTGCCGACGGGGCAGAG              | XhoI    |
| PLIN3-R-NotI      | CGCGCGGCCCGCTACTTCTTCTCCTCCGGGGC         | NotI    |
| SEQ-PLIN3-F       | CTGTGCAGAGCGGCGTGG                       |         |
| PSDM2             |                                          |         |
| PSMD2-F-XhoI      | GCGCTCGAGATGGAGGAGGGAGGCCGG              | XhoI    |
| PSMD2-R-NotI      | CGCGCGGCCCGCTTAGAGATCATAATTGGGGTTCTTCC   | NotI    |
| SEQ-PSMD2-F1      | TGCAGAGCATGAGGCTTGGC                     |         |
| SEQ-PSMD2-F3      | CAGGGAGTGGCTGTTCTGGG                     |         |
| SEQ-PSMD2-R1      | TGTGCTCCCATGTGACGAGG                     |         |
| SEQ-PSMD2-R2      | CAGCCCTCCGGAGTGTAGGC                     |         |
| RDH11             |                                          |         |
| RDH11-RNA-Fw      | GCTCTGGTGCCGCTGCAGCC                     |         |
| RDH11-RNA-Rv      | AGTCTTCTCTTGGGTCCAACCTGG                 |         |
| RDH11-F-HindIII   | GCCAAGCTTGCCACCATGGTTGAGCTCATGTTCCCGC    | HindIII |
| RDH11-R-NotI      | CGCGCGGCCCGCTTTAGTCTATTGGGAGGCCAGCAGG    | NotI    |
| RDH11-sgRNA-S     | CACCGAGTTGATGTACACACCCAC                 |         |
| RDH11-sgRNA-AS    | AAACGTGGGGTGTGTACATCAACTC                |         |
| TK1               |                                          |         |
| TK1-F-XhoI        | CGCCTCGAGAGCTGCATTAACCTGCCCACTGTGC       | XhoI    |
| TK1-R-NotI        | CGCGCGGCCCGCTCAGTTGGCAGGGCTGCATTGC       | NotI    |

444

445

446 **Cell lines and treatments.** U2OS (ATCC), SAOS-2 (ATCC), 143B (Sigma-Aldrich), HOS  
447 (ECACC/Sigma-Aldrich), HS5 (ATCC), G292 clone 141B1 (ECACC/Sigma-Aldrich), HCT-116  
448 (Horizon Discovery), A549 (ATCC), HT-1080 (ATCC), MDA-MB-436 (ATCC), SK-MEL-28  
449 (ATCC), DLD-1 (ATCC), HEK293T (ATCC), MRC5-SV (ECACC/Sigma-Aldrich), HeLa (ATCC)  
450 and PC3 (ATCC) cells were grown in DMEM 10% FBS; CAPAN1 (ATCC) in IMDM 20% FBS;  
451 T47D (ATCC) and CAPAN2 (ATCC) cells in RPMI1640 10% FBS with Glutamax-I; HAP-1 (58)  
452 (Horizon Discovery) in IMDM 10% FBS and BJ-hTERT (gift from R. Weinberg, Whitehead Institute,  
453 Cambridge, USA) in DMEM 15% FBS 16% M199; human adult primary osteoblast (Cell  
454 Applications Inc., Sigma-Aldrich) in human osteoblast growth medium (Cell Applications Inc.,

455 Sigma-Aldrich). All cells media, except human osteoblast growth medium, contained penicillin and  
456 streptomycin (pen./strep.; Thermo Fisher Scientific) and cells were grown at 37 °C in 5% CO<sub>2</sub>  
457 humidified incubator. Cells were used at low passage and routinely confirmed free of Mycoplasma.  
458 Cells were treated in complete growth medium except when stated otherwise.

459 **Plasmid transfection and stable cell generation.** Cells were transfected at 90% confluency in  
460 60 mm dishes and using 5 µg DNA and lipofectamine 2000 (Thermo Fisher Scientific) following  
461 manufacturer's instructions. The day after transfection, cells were seeded at limiting dilution in 140  
462 mm dishes. Selection of stable transfectants was performed either with 0.4 mg/mL G418 or 0.2  
463 µg/mL puromycin. Individual clones were isolated. Homogeneous transgene expression was  
464 confirmed by monitoring cell fluorescence (for GFP tagged constructs) or by immunofluorescence.

465 **CRISPR/Cas9-mediated gene inactivation.** Cells were transfected with pCAG-eSpCas9-2A-  
466 GFP plasmids coding for the *S. pyogenes* Cas9 K848A K1003A R1060A variant, which displays  
467 reduced off-target editing (59), and co-expressing a guide against HSD17B11 or RDH11. One  
468 week after transfection, cells could be plated at limiting dilution to perform selection of individual  
469 clones, which were analysed for proper target inactivation. Rescue experiments were performed  
470 (with HSD17B11 or RDH11) to rule out off-target-related effects.

471 **Small-interfering RNA (siRNA)-mediated depletion.** siRNA with a dTdT 3'extension were  
472 ordered from Eurofins Genomic against the following sequences: Control (Ctrl, target Firefly  
473 Luciferase) CGUACGCGGAAUACUUCGA, HSD17B11 #3 (ORF)  
474 CACAAGATCCTCAGATTGAAA, HSD17B11 #5 (3'-UTR) AACCGTTTATTTAACATATAT,  
475 PSMD2 #5 (ORF) TGGGTGTGTTCCGAAAGTTTA, PSMD2 #9 (3'-UTR)  
476 AAGGTTGTTCAATAAAGACTT. 250 000 U2OS cells were seeded in 6-well plate the day before  
477 the first transfection. The day after, cells were transfected with 50 nM of each siRNA (Control,  
478 PSMD2 or HSD17B11) for 4-5 h according to manufacturer's instruction before the medium being

479 replaced by DMEM 10% FBS without antibiotics. A second transfection was performed the day  
480 after. Cells were seeded in 60 mm dishes the day before being used for experiments.

481 **Cell viability assays.** Cell viability was analyzed using SulfoRhodamine B assays (SRB). Cells  
482 were seeded in 96-well plates 24 h before being treated continuously for 72 h with the indicated  
483 concentration of each molecule. For the experiments described in **Figure 2C**, cells were gently  
484 washed twice with PBS  $\text{Ca}^{2+}/\text{Mg}^{2+}$  just before treatment (to remove residual media), treated with  
485 drugs for 1 h in PBS containing  $\text{CaCl}_2$  and  $\text{MgCl}_2$  (to maintain cellular adhesion), then rinsed twice  
486 with complete medium (to remove residual drug), followed by a 72 h post-incubation in complete  
487 culture medium. For analysis, cells were fixed for 1 h at 4 °C by addition of cold trichloroacetic  
488 acid at a 3.33% final concentration. After being washed four times with water and dried, cells were  
489 stained by a 30 min incubation in a solution of 0.057% (wt:vol) SRB in 1% acetic acid. The wells  
490 were washed four times with 1% acetic acid, dried and the dye was resuspended by a 2 h  
491 incubation in a 10 mM Tris-Base solution. Absorbance at 490 nm of each well was measured  
492 ( $\mu$ Quant plate reader, Bio-tek) and used as a readout of cell number. For calculation, background  
493 absorbance was subtracted to each value and the data were normalized to the value measured  
494 in untreated wells. Each point was measured in duplicate and the graphs correspond to at least  
495 three independent experiments.  $\text{IC}_{50}$  were computed with the GraphPad Prism software using a  
496 non-linear regression to a four-parameter logistic curve (log[inhibitor] vs response; variable slope).

497 **Analysis of RNA expression levels in published dataset.** The data visualization tool Ordino  
498 (60) was used to compare the RNA expression levels of selected genes in The Cancer Cell Line  
499 Encyclopedia RNA-seq dataset ([http://www.broadinstitute.org/ccle\(22\)](http://www.broadinstitute.org/ccle(22))).

500 **Mutagenesis and selection with (S)-3 and (S)-4.**  $100 \cdot 10^6$  haploid HAP1 cells at 60 % confluency  
501 were treated for 72 h with 0.3 mg/mL ethyl methanesulfonate (EMS, Sigma-Aldrich) directly added

502 to the cell medium. After recovery, two 140 mm dishes at  $10^6$  cells/dish were seeded from this  
503 mutagenized population and selected by treatment with 0.25  $\mu$ M DAC (S)-**3** for 72 h. After  
504 treatment, the medium was refreshed and, after 2-3 weeks, individual clones were isolated (DACR  
505 clones). To isolate AACR clones, the DACR clone #A4 at early passage was mutagenized again  
506 (0.3 mg/ml EMS for 72 h). After recovery, the mutagenized DACR population was seeded into 140  
507 mm dishes ( $10^6$  cells/dish) and selected by treatment with 10  $\mu$ M (S)-**4** for 72 h. After treatment,  
508 the medium was refreshed and, after 2-3 weeks, individual clones were isolated (AACR clones).

509 **RNA-seq.** RNA-seq was performed at the GeT-PlaGe core facility, INRA Toulouse, from total RNA  
510 prepared with the RNeasy Plus Mini Kit (Qiagen) according to the manufacturer's instructions.  
511 RNA-seq libraries were prepared according to Illumina's protocols using the Illumina TruSeq  
512 Stranded mRNA sample prep kit. Briefly, mRNAs were selected using poly-dT beads. Then, RNAs  
513 were fragmented and adaptors ligated. Eleven cycles of PCR were applied for library amplification.  
514 Library quality was assessed using a Fragment Analyzer System (Agilent) and libraries were  
515 quantified by Q-PCR using the Kapa Library Quantification Kit (Roche). RNA-seq experiments  
516 were performed on an Illumina HiSeq3000 using a paired-end read length of 2x150 pb. RNA-seq  
517 data have been deposited on SRA (Bioproject IDs PRJNA668246 & PRJNA668322).

518 **RNA-Seq alignment and SNP prediction and filtering.** Read quality was confirmed within the  
519 ng6 environment(61) using fastQC (<http://www.bioinformatics.babraham.ac.uk/projects/fastqc/>)  
520 and Burrows-Wheeler Aligner BWA (62) to search for contamination. The reads were cleaned with  
521 cutadapt v1.8.3 and aligned against hg38 reference human genome with STAR v2.5.2b (63).  
522 Expression levels were computed with featureCounts (64) using Ensembl annotation. Alignments  
523 were deduplicated with samtools rmdup and reads not uniquely mapped removed. Then GATK  
524 v3.5 base quality score recalibration was applied (65). Indel realignment, SNP and INDEL  
525 discovery were performed with HaplotypeCaller using standard hard filtering parameters



526 according to GATK best practices recommendations for RNAseq. Finally variants were annotated  
527 using snpEff v4.3t (66). A python script was used to select protein coding variants specific to  
528 resistant clones as compared to the parental HAP-1 (wild-type for DACR clones, and DACR#A4  
529 for AACR clones) with a minimal allele frequency of 0.9 and a depth greater than 10 reads. Among  
530 these variants, were selected the ones that resulted in frameshifts, mis- and non-sense mutations  
531 as compared to the reference human genome hg38. Cytoscape v3.2.0 (67) was used to identify  
532 genes found mutated in several clones and to generate a graphical overview.

533 **Targeted sequencing of HSD17B11 cDNA from HAP-1 clones.** Total RNAs were extracted  
534 from wild-type or DACR HAP-1 with the RNeasy Plus Mini Kit (Qiagen) according to the  
535 manufacturer's instructions. HSD17B11 cDNA was produced from these RNAs with the  
536 Superscript III First-Strand kit (Thermo Fisher Scientific) according to the manufacturer's  
537 instructions and using the HSD17B11-RNA-Rv primer. The resulting HSD17B11 cDNAs was  
538 amplified using the primer pair HSD17B11-RNA-Fw – HSD17B11-RNA-Rv and sequenced using  
539 the primers HSD17B11-SEQ-F and HSD17B11-SEQ-Rv (Eurofins Genomics).

540 **Antibodies.** For immunoblotting, horse-radish peroxidase-conjugated goat anti-mouse or anti-  
541 rabbit secondary antibodies (Jackson ImmunoResearch Laboratories), or IRDye800CW-  
542 conjugated donkey anti-mouse or anti-rabbit secondary antibodies (LI-COR Biosciences) were  
543 used, diluted at 1/10000 in PBS 0.1% Tween-20. For immunofluorescence, AlexaFluor488- or  
544 AlexaFluor594-conjugated goat anti-mouse or anti-rabbit antibodies (Thermo Fisher Scientific)  
545 were used diluted at 1/1000 in blocking buffer. A list of primary antibodies used in this study,  
546 together with related information is provided in the table below (I.B., Immunoblotting; I.F.,  
547 Immunofluorescence; \* RDH11 antibody was used in immunofluorescence to check  
548 homogeneous RDH11 expression in complemented cells).

549

| Target               | Type                                 | Clone/Ref.           | Raised in | Source               | Dilution for I.B. | Dilution for I.F. |
|----------------------|--------------------------------------|----------------------|-----------|----------------------|-------------------|-------------------|
| <b>53BP1</b>         | Polyclonal                           | NB100-304            | Rabbit    | Novus Biologicals    |                   | 1/800             |
| <b>β-Actin</b>       | Monoclonal                           | MAB1501              | Mouse     | Chemicon             | 1/20000           |                   |
| <b>BRAT1</b>         | Polyclonal                           | A300-728A            | Rabbit    | Bethyl laboratories  | 1/700             |                   |
| <b>COXIV</b>         | Monoclonal (AlexaFluor594 conjugate) | 3E11                 | Rabbit    | Cell signaling       |                   | 1/50              |
| <b>GFP</b>           | Monoclonal                           | 7.1 + 13.1           | Mouse     | Roche                | 1/2000            |                   |
| <b>H2AX</b>          | Polyclonal                           | ab11175              | Rabbit    | Abcam                | 1/4000            |                   |
| <b>gH2AX</b>         | Monoclonal                           | JBW301               | Mouse     | Millipore            |                   | 1/1000            |
| <b>HPGD</b>          | Polyclonal                           | HPA005679            | Rabbit    | Sigma-Aldrich        | 1/100             |                   |
| <b>HSD17B11</b>      | Polyclonal                           | 16303-1-AP           | Rabbit    | Proteintech          | 1/250             |                   |
| <b>HSP70</b>         | Polyclonal                           | 10995-1-AP           | Rabbit    | Proteintech          | 1/3000            |                   |
| <b>IRE1α-Ph S724</b> | Polyclonal                           | NB100-2323SS         | Rabbit    | Novus Biologicals    | 1/1000            |                   |
| <b>Ku80</b>          | Monoclonal                           | Clone 111            | Mouse     | Thermo               | 1/200             |                   |
| <b>p21 WAF1/CIP1</b> | Polyclonal                           | sc-397-G / C-19      | Goat      | Santa Cruz           | 1/100             |                   |
| <b>PARP-1</b>        | Polyclonal                           | #9542                | Rabbit    | Cell Signaling Tech. | 1/1000            |                   |
| <b>PSMD2</b>         | Polyclonal                           | A303-854A-T          | Rabbit    | Bethyl laboratories  | 1/700             |                   |
| <b>RDH11</b>         | Monoclonal                           | Clone 1B4 / GTX83716 | Mouse     | GeneTex              | 1/1000            | 1/200*            |
| <b>SAFA</b>          | Monoclonal                           | 3G6                  | Mouse     | Santa Cruz           | 1/100             |                   |
| <b>Ubiquitin</b>     | Monoclonal                           | Clone VU-1           | Mouse     | LifeSensors          | 1/1000            |                   |

550  
551 **Live imaging.** Pictures of living cells were acquired using an Olympus IX73 fluorescence  
552 microscope fitted with a 40X objective (0.75NA UPlanFLN, Olympus) or a 20X 0.40 NA objective  
553 (LCACHN 0.4NA, Olympus), a X-Cite Series 120Q lamp (Lumen dynamics), a DP26 camera  
554 (Olympus) and using the adequate filters set. For time series, cells were seeded in glass-bottom  
555 dishes (from MatTek or ibidi μSlide) in phenol red-free Leibovitz's L-15 medium containing 10%  
556 FBS and pen./strep. For each time point, z-stacks were acquired using a Andor/Olympus  
557 Yokogawa CSU-X1 confocal spinning disk fitted with 60X (UPLSAPO NA 1.35, Olympus) or 100X  
558 (UPLSAPO NA 1.4, Olympus) objectives, a Andor iXon Life 888 EM-CCD camera and with  
559 temperature and humidity control. The white scale bars on representative pictures represent 10  
560 μm.

561 **Immunofluorescence.** Cells were seeded on glass coverslips (#1.5 thickness; ~170 μm, VWR).  
562 At the end of the treatment, the cells were washed twice with PBS, fixed by a 15 min incubation  
563 with 2% paraformaldehyde (PFA) in PBS and washed three times. The cells were then

564 permeabilized 5 min with 0.2% Triton X-100 in PBS and washed three times with PBS. The  
565 coverslips were incubated 10 min in blocking buffer consisting in PBS 0.1% Tween-20 (PBS-T)  
566 containing 5% bovine serum albumin (BSA). The coverslips were incubated for 75 min with the  
567 primary antibodies diluted in blocking buffer (mouse anti- $\gamma$ H2AX antibody at 1/1000 and rabbit  
568 anti-53BP1 at 1/800), washed four times in PBS-T and then incubated 45 min with the secondary  
569 antibodies diluted in blocking buffer, washed four times in PBS-T and twice in PBS, incubated 15  
570 min with 2  $\mu$ g/mL DAPI (4',6-diamidino-2-phenylindole) in PBS, washed twice with PBS, dipped in  
571 double-distilled water and mounted in VectaShield on a glass slide. Pictures were acquired using  
572 an Olympus IX73 microscope fitted with a 40x UPlanFLN objective (Olympus), a X-Cite Series  
573 120Q lamp (Lumen dynamics), a DP26 camera (Olympus) and using the adequate filters set. The  
574 white scale bars on each picture represent 10  $\mu$ m.

575 **Immunoblotting.** For whole-cell extracts (WCE), cells were washed with cold PBS and scrapped  
576 in 75  $\mu$ L SDS-lysis buffer (120 mM Tris-HCl pH 6.8, 20% glycerol, 4% SDS), incubated 5 min at  
577 95 °C and passed 10 times through a 25G needle. Measuring the absorbance at 280 nm with a  
578 Nanodrop spectrometer (Thermo Fisher Scientific) was used to evaluate protein concentration  
579 and, after adjustment with SDS-Lysis buffer, extracts were diluted by addition of equal volume of  
580 SDS-Loading Buffer (5 mM Tris pH 6.8, 0.01% bromophenol blue, 0.2 M dithiothreitol).  
581 Immunoblotting was performed with 25-50  $\mu$ g of WCE. Proteins were separated on gradient gels  
582 (BioRad 4-12% TGX pre-cast gels) and transferred onto Protran 0.45  $\mu$ m nitrocellulose  
583 membranes (GE Healthcare). After transfer, membranes could be scanned with an infrared imager  
584 (Odyssey, LI-Cor Biosciences) to acquire the signal from AlexaFluor647 modified proteins.  
585 Homogeneous loading and transfer were checked by Ponceau S staining. When necessary,  
586 membranes were cut into horizontal strips to simultaneously probe for multiple proteins. For  
587 immunoblotting, membranes were blocked with PBS containing 5% non-fat dry cow milk, washed  
588 and incubated for 1-2 h at room temperature or 16 h at 4 °C with primary antibodies diluted in

589 PBS-T containing 1% bovine serum albumin (immunoglobulin- and lipid-free fraction V BSA,  
590 Sigma-Aldrich). After extensive washes, membranes were probed 1 h at room temperature with  
591 adequate secondary antibodies coupled with horse-radish peroxidase (HRP) or with  
592 IRDye800CW. For HRP-conjugated secondary antibodies, signal acquisition was performed with  
593 a CCD camera (Chemidoc, BioRad) or using autoradiographic films (Blue Devil, Genesee  
594 Scientific) after incubation with peroxidase chemiluminescent substrates (BioRad Clarity ECL for  
595 CCD acquisition; Advansta WesternBright ECL for autoradiographic film exposure). For  
596 IRDye800CW-coupled secondary antibodies, membranes were scanned using an infrared imager  
597 (Odyssey, LI-Cor Biosciences).

598 **Analysis by SDS-PAGE of proteins modified by DACs in cells.** Sub-confluent 140 mm dishes,  
599 seeded two days before with U2OS or HAP-1 cells, were treated for 2 h with 2  $\mu$ M of DAC. At the  
600 end of treatment, cells were collected by trypsination and centrifugation (900 RPM, 4  $^{\circ}$ C, 5 min).  
601 The cell pellet was washed with cold PBS before being lysed by sonication on ice (Vibracell,  
602 Bioblock Scientific, ten 2s-pulses, of amplitude 30) in 400  $\mu$ L of IPL buffer (20 mM Tris-HCl pH  
603 7.8, 1 mM EDTA, 150 mM NaCl, 0.5% IGEPAL CA-630, HALT proteases and phosphatases  
604 inhibitor cocktail (Thermo Fisher Scientific)). A centrifugation (15000 RPM, 4  $^{\circ}$ C, 4 min) was used  
605 to remove insoluble material and the supernatant was used for click reactions. The click reaction  
606 was performed by incubation at 20  $^{\circ}$ C for 30 h of a mix containing 240  $\mu$ g of proteins (diluted in  
607 10  $\mu$ L IPL buffer), 4 mM CuSO<sub>4</sub>, 5  $\mu$ M azido-AlexaFluor647 and 10 mM sodium ascorbate in IPD  
608 buffer (20 mM Tris-HCl pH 7.8, 1 mM EDTA, 150 mM NaCl, 0.05% IGEPAL CA-630, HALT  
609 inhibitors cocktail) to reach 80  $\mu$ L. 20  $\mu$ L of 5XLoading Buffer (300 mM Tris-HCl pH 6.8, 5% SDS,  
610 0.025% bromophenol blue, 15% glycerol, 250 mM dithiothreitol) was added at the end of the  
611 reaction, followed by incubation at 95  $^{\circ}$ C for 5 min. 24  $\mu$ g of proteins were separated on SDS-  
612 PAGE gels (BioRad 4-15% TGX pre-cast gels), followed by transfer onto Protran 0.45  $\mu$ m

613 nitrocellulose membranes (GE Healthcare) which were scanned on an infrared imager (Odyssey,  
614 LI-COR Biosciences). A ponceau S staining was used to control for homogeneous loading.

615 **Immunoprecipitation (IP).** For IP, U2OS and HAP-1 parental or overexpressing GFP-tagged  
616 protein cell lines were seeded in 140 mm dishes two days before treatment. Sub-confluent cells  
617 were treated (or not) with the indicated molecules for 2 h. At the end of treatment, cells were  
618 collected by trypsination and centrifugation (900 RPM, 5 min, 4 °C). The cell pellet was washed  
619 with cold PBS before being lysed by sonication on ice (Vibracell, Bioblock Scientific, ten 2s-pulses,  
620 of amplitude 30) in 400 µL of IPL buffer (20 mM Tris-HCl pH 7.8, 1 mM EDTA, 150 mM NaCl,  
621 0.5% IGEPAL CA-630, HALT proteases and phosphatases inhibitor cocktail (Thermo Fisher  
622 Scientific)). A centrifugation (15000 RPM, 4 °C, 4 min) was used to remove insoluble material and  
623 the supernatant was used for IP. IP were performed by incubation of lysates 4 h at 4 °C on a  
624 rotating wheel with either 50 µL of DynaBeads M-280 protein A magnetic beads (Thermo Fisher  
625 Scientific), pre-loaded with 8 µg of rabbit control (Dako) or anti-PSMD2 (Bethyl Laboratories)  
626 antibodies, or with 50 µL of anti-GFP magnetic beads (GFP-Trap, Chromotek). Each IP was done  
627 on 240 µg of proteins diluted in 220 µL of IPL buffer to which 480 µL of IPD buffer was added (to  
628 dilute IGEPAL CA-630 to ~0.15%). On-bead protein modification by DACones could be performed  
629 at that stage (see below). Then the beads were washed 3 times with high-salt IPW buffer (20 mM  
630 Tris-HCl pH 7.8, 1 mM EDTA, 500 mM NaCl, 0.05% IGEPAL CA-630, HALT inhibitors cocktail)  
631 and once with IPD buffer (with 500 µL for each wash).

632 **On-bead protein modification by DACones.** After IP, beads were washed twice in MoD buffer  
633 (10 mM phosphate pH 7.4, 2.7 mM KCl, 137 mM NaCl, 0.05% IGEPAL CA-630, HALT proteases  
634 and phosphatases inhibitor cocktail). Reactions with DACones were performed by incubating the  
635 beads 30 min at 30 °C with vigorous intermittent shaking in 400 µL of MoD buffer containing 1 µM  
636 DAC (S)-**9** or DACone **10**. Beads were then washed with IPW buffer as described above and  
637 clicked as described below.

638 **On-bead click with azido-AlexaFluor647.** Immunopurified proteins were clicked on beads by a  
639 30 min-incubation at 20 °C with vigorous intermittent shaking in 200 µL of IPD buffer containing 4  
640 mM CuSO<sub>4</sub>, 5 µM azido-AlexaFluor647 and 10 mM sodium ascorbate. The beads were washed  
641 with IPD buffer and resuspended in 20 µL SDS-Lysis Buffer to which 20 µL of SDS Loading buffer  
642 was added. Beads were incubated 5 min at 95 °C in this solution and 20 µL of supernatant was  
643 analyzed on gradient gels (BioRad 4-12% TGX pre-cast gels). The modified proteins were  
644 detected with an infrared imager (Odyssey, LI-COR Bioscience) after transfer onto a nitrocellulose  
645 membrane (Protran, 45 µm pores, GE Healthcare) and total proteins on the membrane were  
646 stained with Ponceau S.

647 ***In vitro* protein modification by DACones for analysis by SDS-PAGE.** FBS (Euromedex),  
648 bovine serum albumin (BSA, A-7030, Sigma-Aldrich), bovine carbonic anhydrase (CANH, C-3934,  
649 Sigma-Aldrich), Jack bean concanavalin A (ConcA, C-2010, Sigma-Aldrich), bovine beta-  
650 lactoglobulin (BLG, L-3908, Sigma-Aldrich) were resuspended at 2 mg/mL in MoD buffer.  
651 Reactions were performed for 40 min at 30 °C in 50 µL of MoD buffer containing 20 µg of protein  
652 and 2 µM of DAC or DACone. The reactions were then diluted to 75 µL by sequential addition of  
653 IPD buffer, CuSO<sub>4</sub>, azido-AlexaFluor647 and sodium ascorbate to a final concentration of 4 mM,  
654 4 µM and 10 mM, respectively and incubated 30 min at 20 °C with vigorous intermittent shaking.  
655 At that stage, unclicked azido-AlexaFluor647 could be removed using BioRad MicroBioSpin P-6  
656 columns equilibrated with SDS-Lysis buffer and following manufacturer's instructions. Then, 8 µL  
657 of the click reaction medium were supplemented with 12 µL of SDS-Lysis buffer and 20 µL of SDS  
658 Loading buffer, incubated 5 min at 95 °C and separated on gradient gels (BioRad 4-12% TGX pre-  
659 cast gels). The modified proteins could be detected with an infrared imager (Odyssey, LI-COR  
660 Biosciences) directly in the gel or after transfer onto a nitrocellulose membrane. Total proteins in  
661 the gel or on the membrane were visualized using Coomassie (InstantBlue, Sigma-Aldrich,  
662 scanned with the Odyssey or BioRad Chemidoc imagers) or Ponceau S staining, respectively.

663 ***In vitro* DAC bioactivation assays.** HSD17B11 was immunopurified from UO2S KO HSD17B11  
664 complemented either with HSD17B11-GFP wild-type or the S172L mutant. After extensive washes  
665 with a buffer containing 500 mM NaCl, the magnetic beads were used as a source of HSD17B11  
666 enzyme. HSD17B11 is a membrane-anchored protein (17) and its activity required maintaining a  
667 minimal 0.2% IGEPAL CA-630 concentration in all the buffers. In details, after IP, 30  $\mu$ L of beads  
668 were washed twice with MoD buffer and incubated 30 min at 30 °C with vigorous intermittent  
669 shaking in 50  $\mu$ L of MoD buffer containing 0.2% IGEPAL CA-630, 1 mM  $\beta$ -NAD<sup>+</sup>, 2  $\mu$ M (S)- or (R)-  
670 **9** and 40  $\mu$ g of beta-lactoglobulin (BLG, L-3908, Sigma-Aldrich). The reactions were then diluted  
671 to 75  $\mu$ L by sequential addition of MoD buffer, CuSO<sub>4</sub>, azido-AlexaFluor647 and sodium ascorbate  
672 to final concentrations of 4 mM, 3  $\mu$ M and 10 mM, respectively. The click reaction was performed  
673 by incubation 30 min at 20 °C with vigorous intermittent shaking. 8  $\mu$ L of supernatant, containing  
674 the BLG, was supplemented with 12  $\mu$ L of SDS-Lysis and 20  $\mu$ L SDS Loading buffer, incubated 5  
675 min at 95 °C before analysis by SDS-PAGE and transfer onto a nitrocellulose membrane (Protran,  
676 45  $\mu$ m pores, GE Healthcare). DACone adducts onto BLG were visualized by scanning the  
677 membrane with an infrared imager (Odyssey, LI-COR Biosciences) and total protein stained with  
678 Ponceau S.

679 **MS analysis of entire  $\beta$ -lactoglobulin modified by DACone.** Commercially available purified  
680 BLG (mixture of isoforms A and B) was incubated for 40 min at 30 °C in 40  $\mu$ L of MoD buffer  
681 containing 30  $\mu$ M BLG and 100  $\mu$ M DACone **10** (or the same volume of acetonitrile as control,  
682 10% final concentration). Prior to MS analysis, unmodified and modified BLG samples were  
683 desalted in 200 mM ammonium acetate, pH 7 using BioRad Micro Bio-Spin 6 devices and diluted  
684 to ~4  $\mu$ M in 50% acetonitrile plus 0.2% formic acid final. Samples were analyzed on a SYNAPT  
685 G2-Si mass spectrometer (Waters, Manchester, UK) running in positive ion mode and coupled to  
686 an automated chip-based nano-electrospray source (Triversa Nanomate, Advion Biosciences,  
687 Ithaca, NY, USA). The voltage applied to the chip and the cone voltage were set to 1.6 kV and



688 150 V, respectively. The instrument was calibrated with a 2 mg/mL cesium iodide solution in 50%  
689 isopropanol. Raw data were acquired with MassLynx 4.1 (Waters, Manchester, UK) and  
690 deconvoluted with UniDec using the following parameters: m/z range: 1,300-2,800 Th; subtract  
691 curved: 1; Gaussian smoothing: 10; bin every 1 Th; charge range: 5-15; mass range: 18,000-  
692 19,000 Da; sample mass: every 1 Da; peak FWHM: 1 Th; peak detection range: 50 Da, and peak  
693 detection threshold: 0.1. The mass spectrometry proteomics data have been deposited to the  
694 ProteomeXchange Consortium via the PRIDE (68) partner repository with the data set identifier  
695 PXD021955.

696 **isoDTB-ABBP-based framework for assessing the proteome-wide selectivity of DACones.**

697 Total cell extracts from U2OS cells were prepared by sonicating in 5 mL of PBS 0.1% IGEPAL  
698 CA-630 containing protease and phosphatase inhibitors (HALT cocktail, Pierce) a pellet of 1.5 mL  
699 of U2OS cells, collected by scrapping in cold PBS, followed by centrifugation 30 min at 15000  
700 RPM at 4°C. Protein concentration in the supernatant was evaluated using a Nanodrop device  
701 (Thermo Fisher Scientific) and the extracts diluted at 1 mg/mL with PBS containing protease and  
702 phosphatase inhibitors. 1 mL of extracts was incubated for 40 min at 30°C with 100 µM of DACone  
703 **10** or **11** or acetonitrile (1% final, solvent control). Proteins were then precipitated overnight at -  
704 20°C by addition of 4 volumes of cold acetone followed by centrifugation at 16000 g for 15 min at  
705 4°C. The precipitates were resuspended in 1 mL cold MeOH by sonification and centrifuged  
706 (10 min, 21100 ×g, 4 °C). The supernatant was removed and the washing step with MeOH was  
707 repeated once. The pellets were dissolved in 1 mL 0.8% SDS in PBS by sonification. Duplicates  
708 were performed for each condition, one being clicked with the heavy isoDTB tag, the other one  
709 with the light tag. The click reaction, all subsequent experimental and analytical steps were  
710 performed as described (30). The data presented correspond to two independent experiments  
711 (Exp.1 and 2 in **Supplementary Files 1 and 2**). PSSM sequence logos were generated by  
712 analyzing the 10 amino acids surrounding the modified site using Seq2Logo (69). The mass



713 spectrometry proteomics data have been deposited to the ProteomeXchange Consortium via the  
714 PRIDE (68) partner repository with the data set identifier PXD021955.

715 **Reaction of DACone with purified proteins for analysis of the absorbance spectrum.**

716 Reactions were performed by incubation at 30 °C for 40 min in 30 µL of MoD buffer containing  
717 115 µg of protein (equivalent to 0.1 mM BLG and 0.035 mM BSA) and 0.3 mM of DAC or DACone.  
718 2 µL of each reaction were used to acquire a UV-visible (190-840 nm) absorbance spectrum on a  
719 Nanodrop device (Thermo Fisher Scientific).

720 **Reaction of DACones with NAG, NAC and NAK for analysis of the absorbance spectrum.**

721 Reactions were performed by incubation at 30 °C for 40 min in 40 µL of a mixture containing 1  
722 mM NAG, NAC or NAK and 1 mM DACone **8** in 20 mM phosphate buffer (pH 7.4) or 10 mM KOH  
723 (pH 10). A UV-visible (190-840 nm) absorbance spectrum for each reaction was acquired using a  
724 Nanodrop spectrometer (Thermo Fisher Scientific).

725 **NMR characterization of DACone reaction products with *N*<sub>α</sub>-Acetyl Lysine and *N*-Acetyl**

726 **Cysteine.** Reactions were performed by incubating at 30 °C for 40 min a 300 µL mixture containing  
727 20 mM DACone **8**, 20 mM NAC or 20 mM NAK and 10 mM KOH (pH 10) or 20 mM phosphate  
728 buffer (pH 7.2). Each reaction was characterized by high-resolution mass spectrometry. After  
729 lyophilization, the samples were dissolved at a concentration of 10 mM in PBS buffer pH 7.4 with  
730 10% D<sub>2</sub>O containing DSS at 1 µM. All compounds were fully characterized by <sup>1</sup>H and <sup>13</sup>C NMR  
731 spectroscopy. NMR spectra were recorded at 298 K on Avance III HD 700 spectrometer (<sup>1</sup>H:  
732 700.13 MHz, <sup>13</sup>C: 176.04 MHz). <sup>1</sup>H NMR spectra were recorded with water suppression. The  
733 correlation <sup>1</sup>H spectroscopy was acquired with the Bruker pulse sequence dipsiesgp using an  
734 excitation sculpting sequence for water suppression. The recycle delay was set to 1.5 s. <sup>1</sup>H-<sup>13</sup>C  
735 HSQC experiment (Bruker pulse sequence hsqcphpr) was recorded with carrier frequencies set  
736 to 4.7 ppm (<sup>1</sup>H) and 85 ppm (<sup>13</sup>C) and the spectral widths were set to 12 ppm (<sup>1</sup>H) and 180 ppm

737 (<sup>13</sup>C). For this experiment, the recycle delay was set to 1 s. Spectral data are provided in  
738 **Supplementary Figure 8** and **Supplementary Note 5**.

739 **Identification of proteins modified by DAC (S)-9 in cells.** Two 140 mm dishes, seeded with  
740 2.5x10<sup>6</sup> U2OS cells two days before, were treated for 2 h with 2 μM of DAC (S)-9 or (R)-9. At the  
741 end of treatment, cells were collected by trypsination and centrifugation (900 RPM, 4 °C, 5 min).  
742 The cell pellet was washed with cold PBS before being lysed by sonication on ice (Vibracell,  
743 Bioblock Scientific, ten 2s-pulses, of amplitude 30) in 240 μL of IPL buffer (20 mM Tris-HCl pH  
744 7.8, 1 mM EDTA, 150 mM NaCl, 0.5% IGEPAL CA-630, HALT proteases and phosphatases  
745 inhibitor cocktail (Thermo Fisher Scientific)). A centrifugation (15000 RPM, 4 °C, 4 min) was used  
746 to remove insoluble material and the supernatant was used for click pull-down. A volume of lysate  
747 corresponding to 300 μg of proteins was diluted to 500 μL with IPD buffer (20 mM Tris-HCl pH  
748 7.8, 1 mM EDTA, 150 mM NaCl, 0.05% IGEPAL CA-630, HALT inhibitors cocktail) bringing  
749 IGEPAL CA-630 concentration to 0.2-0.25%. The lysate was pre-cleared by incubation with 60 μL  
750 streptavidin-coupled magnetic beads (Dynabeads M-280, Thermo Fisher Scientific) 1 h at 4 °C on  
751 a rotating wheel. Then CuSO<sub>4</sub>, biotin-azido and sodium ascorbate were added to the pre-cleared  
752 lysate at 4 mM, 5 μM and 10 mM final concentration, respectively. The click-reaction was  
753 performed by incubation for 30 min at 20 °C in the dark with vigorous intermittent shaking and the  
754 free biotin was removed from the clicked extracts using PD MiniTrap G-25 column (GE Healthcare)  
755 equilibrated with IPD buffer. The extracts were then complemented to 600 μL with IPD buffer and  
756 incubated for 2 h at 4 °C on a rotating wheel with 60 μL of streptavidin-coupled magnetic beads  
757 (Dynabeads M-280, Thermo Fisher Scientific). The beads, corresponding to the proteins  
758 associated to (S)- or (R)-9, were then washed extensively with high-salt IPW buffer (20 mM Tris-  
759 HCl pH 7.8, 1 mM EDTA, 500 mM NaCl, 0.05% IGEPAL CA-630, HALT inhibitors cocktail), then  
760 with IPD buffer. For on-bead tryptic digestion, beads were washed twice with 50 mM ammonium  
761 bicarbonate buffer, and then suspended in 7 M urea and 25 mM DTT (Sigma-Aldrich). After 60

762 min under agitation (850 rpm) at room temperature, the samples were alkylated by incubation in  
763 90 mM iodoacetamide (Sigma-Aldrich) during 30 min in the dark. Samples were then washed  
764 twice as described above and submitted to overnight proteolysis in ammonium bicarbonate buffer  
765 containing 1 µg of trypsin (Promega) per sample at 37 °C. The supernatants were collected, dried  
766 in speed-vac and resuspended with 2% acetonitrile and 0.05% trifluoroacetic acid (Sigma-Aldrich),  
767 for mass spectrometry analysis. The resulting peptides were analyzed with a NanoLC (Ultimate  
768 3000 RSLCnano system Thermo Scientific) coupled to a LTQ Orbitrap Velos mass spectrometer  
769 (Thermo Fisher Scientific, Bremen, Germany). Raw MS files were processed with MaxQuant  
770 v1.5.2.8 software for database search with the Andromeda search engine and quantitative  
771 analysis. Data were searched against human entries in the Swissprot protein database. To  
772 perform relative quantification between proteins identified, we used the LFQ from the MaxQuant  
773 “protein group.txt” output. The experiment was repeated three times (exp. #1, #2 and #3 in  
774 **Supplementary File 3**). The mass spectrometry proteomics data have been deposited to the  
775 ProteomeXchange Consortium via the PRIDE (68) partner repository with the data set identifier  
776 PXD021955. For each protein identified, the ratio (S)-9 vs (R)-9 conditions was computed (fold  
777 change, FC) and a t-test was used to select proteins reproductively enriched (FC > 2 and p < 0.05)  
778 in the (S)-9 vs (R)-9 condition. Cytoscape(67) was used to generate **Figure 3B** visual  
779 representation, in which the FC is color-coded, while the -log(p) was used to define protein box  
780 size (*id* large box means highly significant enrichment).

#### 781 **Click-based imaging, GFP fluorescence and immunofluorescence imaging, pre-extraction.**

782 Cells were seeded on #1.5 glass coverslips (VWR) the day before the experiment. For labelling  
783 mitochondria with MitoTracker, MitoTracker Red CMXRos (Thermo Fisher Scientific) was added  
784 at 0.2 µM in complete medium 30 min before the end of the treatments. To monitor the association  
785 of GFP-BRAT1 to insoluble compartments, cells were pre-extracted at the end of the treatment by  
786 a 2 min incubation on ice in cold PBS 0.1% Triton X-100 containing HALT proteases/phosphatase

787 inhibitors cocktail. At the end of treatments or after pre-extraction, cells were washed twice with  
788 PBS, fixed 15 min with 2% PFA in PBS and washed three times with PBS. Cells were  
789 permeabilized by incubation 8 min in PBS 0.2% Triton X-100 before being washed three times  
790 with PBS. When co-staining with antibody was performed, cells were incubated 10 min in IF  
791 blocking buffer (PBS-T 5% BSA), before being incubated 75 min with AlexaFluor594-coupled anti-  
792 COXIV antibody diluted at 1:50 in IF blocking buffer. For co-staining of ER membranes with  
793 concanavalin A, fixed cells were incubated 30 min AlexaFluor488-coupled concanavalin A diluted  
794 at 100 µg/mL in blocking buffer. At the end of antibody/concanavalin staining, cells were washed  
795 four times, fixed for 15 min, washed three times with PBS and incubated in blocking buffer. Click  
796 with AlexaFluor488-azido or AlexaFluor594-azido was performed as described (70). At the end of  
797 the procedure, cells were washed four times with PBS-T, twice with PBS and incubated 15 min in  
798 PBS containing 2 µg/mL DAPI (Sigma-Aldrich). The coverslips were washed twice with PBS and  
799 mounted with VectaShield (Vector laboratories) on glass slides. Images were acquired on a  
800 Deltavision PersonalDV microscope (Applied Precision, 1024x1024 CoolSNAP HQ, z-stack of 0.2  
801 µm interval) equipped with a 100x UPlanSApo/1.40 oil objective (Olympus) or with a Zeiss Elyra  
802 7 3D Lattice SIM super-resolution microscope fitted with a 63X objective (PLANAPO NA 1.4,  
803 Zeiss) and dual sCMOS cameras (pco.edge). Deconvolutions were then performed with SoftWoRx  
804 (Applied Precision) in conservative mode while 3D-SIM reconstruction were performed with Zen  
805 Black (Zeiss). The white scale bars on representative pictures represent 10 µm.

806 **Flow cytometry.** U2OS stably expressing the UPS fluorescent reporter Ub-G76V-YFP (38) were  
807 treated for 4 h with 20 µM MG132 or 1 µM (S)-3. At the end of the treatment, cells were collected  
808 by trypsination, washed in PBS 1% BSA and fixed by incubation at room temperature in 500 µL  
809 of 2% PFA in PBS. Cells were washed with PBS 1% BSA and stored in the same buffer. A  
810 minimum of 30 000 cells were analyzed on BD LSR II flow cytometer (Becton Dickinson). Data

811 were analyzed and formatted using FlowJo v8.8.7. Untreated cells were used to define a gate to  
812 identify the YFP positive cells in the treated conditions.

813 **Synthesis.** Synthesis and characterization of (*S*)-**1**(8), (*R*)-**1**(8), (*R*)-**2**(8), (*S*)-**3**(8), (*R*)-**3**(8), (*S*)-  
814 **4**(8),(*R,Sa*)-**5**(19), (*S, Sa*)-**5**(19), (*S*)-**6**(20), (*S*)-**9**(33), (*R*)-**9**(33) have been described previously.  
815 Enantiomeric (ee) and diastereomeric (de) excesses of aforementioned compounds are the  
816 following: (*S*)-**1** (90% ee), (*R*)-**1** (80% ee), (*R*)-**2** (80% ee), (*S*)-**3** (91% ee), (*R*)-**3** (93% ee), (*S*)-**4**  
817 (91% ee), (*R,Sa*)-**5** (98% ee, 91% de), (*S,Sa*)-**5** (89% ee, 74% de), (*S*)-**6** (89% ee), (*S*)-**9** (97%  
818 ee), (*R*)-**9** (73% ee). Synthesis and characterization of new compounds is described in  
819 **Supplementary Note 4** and NMR spectra of all new compounds are provided in **Supplementary**  
820 **Note 6.**

821 **Data availability.** RNA-seq data, proteomics data and plasmids have been deposited on SRA,  
822 PRIDE and Addgene, respectively. All other data are available upon request.

823

824

## 825 **Acknowledgements**

826 We are grateful to the Genotoul bioinformatics platform Toulouse Occitanie and TRI-IPBS  
827 Imaging Core Facility, member of TRI-Genotoul, for providing help, computing and storage  
828 resources. The NMR spectra were recorded on spectrometers of the Integrated Screening  
829 Platform of Toulouse (PICT, IBISA). We thank Laurence Nieto (team C. Muller, IPBS, Toulouse,  
830 France), Raphaël Rodriguez (Institut Curie, Paris, France), Frédérique Fallone (Team C. Muller,  
831 IPBS, Toulouse, France), Frédéric Deschaseaux (STROMALab, Toulouse, France), Pierre  
832 Cordelier (CRCT, Toulouse, France), Robert A. Weinberg (Whitehead Institute, Boston, USA),  
833 Erik Snapp (HHMI's Janelia Research Campus, Ashburn, USA), Nico Dantuma (Karolinska  
834 Institutet, Stockholm, Sweden) for the generous gift of reagents; Antonio Peixoto & Emmanuelle  
835 Näser (IPBS, Toulouse, France) for technical assistance; Andreas Merdes (CBI, Toulouse) for  
836 providing access to his microscope. We gratefully acknowledge Stephan A. Sieber and his group  
837 for their generous support. This study was funded by the grants IDEX Transversalité "Fishing  
838 Sponge" (2015 program) from Université Paul Sabatier; N°PJA 20171206477 from "Fondation  
839 ARC", ANR-17-CE18-0002-01 from "Agence Nationale de la Recherche" and CAPES-COFECUB  
840 Ph-C n° 883/17. The GeT and proteomics facilities received funding from "Investissements  
841 d'avenir" program as part of the "Genomic French Infrastructure" (grant ANR-10-INBS-09) and the  
842 "Proteomics French Infrastructure" (grant ANR-10-INBS-08 to O.B.-S.), respectively. The  
843 Proteomics facility received financial support from the "Fonds Européens de Développement  
844 Régional Toulouse Métropole and the Région Midi-Pyrénées" (to O.B.-S.). S.M.H. and P.R.A.Z.  
845 acknowledge funding by the Fonds der Chemischen Industrie through a Liebig Fellowship and a  
846 Ph.D. fellowship and by the TUM Junior Fellow Fund.

847

## 848 **Author contributions**

849 The authors contributed in the following manner: Conceptualization (S.Br. with inputs from P.C.,  
850 P.D., J.M., E.J., Y.G., V.M., R.C., J.-B.I.), performed experiments (S.Br., P.D., J.M., P.R.A.Z., K.P.,  
851 R.H., M.M., R.-F.S., J.-B.I. with inputs from P.C., S.M.H., E.J., O.B.-S., O.B.), conceptualized and  
852 designed small molecules synthesis (R.C., Y.G., V.M., V.B.-G., S.Ba., M.C.F.O. with inputs from  
853 D.L., P.R.), performed small molecules synthesis (D.L., P.R., C.B., M.V.B.), performed  
854 bioinformatics analysis (C.N., P.R.A.Z., S.M.H.), analyzed the data (S.Br., P.D., J.M., P.R.A.Z.,  
855 S.M.H., P.C., E.J., Y.G., R.C.), wrote the paper (S.Br with inputs from S.M.H., E.J., Y.G., R.C.,  
856 V.M., P.C., V.B.-G.).

857

#### 858 **Competing interests**

859 A patent related to this work has been submitted.

860

861 **References**

- 862 1 Newman, D. J. & Cragg, G. M. Natural Products as Sources of New Drugs over the  
863 Nearly Four Decades from 01/1981 to 09/2019. *J Nat Prod* **83**, 770-803,  
864 doi:10.1021/acs.jnatprod.9b01285 (2020).
- 865 2 Bergmann, W. & Feeney, R. J. The isolation of a new thymine pentoside from sponges. *J*  
866 *Am Chem Soc* **72**, 2809-2810, doi:10.1021/ja01162a543 (1950).
- 867 3 Ellison, R. R. *et al.* Arabinosyl cytosine: a useful agent in the treatment of acute leukemia  
868 in adults. *Blood* **32**, 507-523 (1968).
- 869 4 Seo, Y., Cho, K. W., Rho, J.-R., Shin, J. & Sim, C. J. Petrocortynes and  
870 petrosiacetylenes, novel polyacetylenes from a sponge of the genus *Petrosia*.  
871 *Tetrahedron* **54**, 447-462, doi:10.1016/S0040-4020(97)10290-3 (1998).
- 872 5 Ortega, M. J., Zubía, E., Carballo, J. L. & Salvá, J. Fulvinol, a New Long-Chain  
873 Diacetylenic Metabolite from the Sponge *Reniera fulva*. *J Nat Prod* **59**, 1069-1071,  
874 doi:10.1021/np960436l (1996).
- 875 6 Gunasekera, S. P. & Faircloth, G. T. New acetylenic alcohols from the sponge  
876 *Cribrachalina vasculum*. *J Org Chem* **55**, 6223-6225, doi:10.1021/jo00312a035 (1990).
- 877 7 Zovko, A. *et al.* Marine sponge *Cribrachalina vasculum* compounds activate intrinsic  
878 apoptotic signaling and inhibit growth factor signaling cascades in non-small cell lung  
879 carcinoma. *Mol Cancer Ther* **13**, 2941-2954, doi:10.1158/1535-7163.MCT-14-0329  
880 (2014).
- 881 8 El Arfaoui, D. *et al.* Identification of chiral alkenyl- and alkynylcarbinols as  
882 pharmacophores for potent cytotoxicity. *ChemMedChem* **8**, 1779-1786,  
883 doi:10.1002/cmdc.201300230 (2013).
- 884 9 Listunov, D. *et al.* Extended structural modulation of bio-inspired chiral lipidic  
885 alkynylcarbinols as antitumor pharmacophores. *Tetrahedron* **71**, 7920-7930,  
886 doi:10.1016/j.tet.2015.08.003 (2015).
- 887 10 Listunov, D. *et al.* From Natural to Artificial Antitumor Lipidic Alkynylcarbinols:  
888 Asymmetric Synthesis, Enzymatic Resolution, and Refined SARs. *Synthesis* **50**, 3114-  
889 3130, doi:10.1055/s-0037-1610006 (2018).
- 890 11 Carette, J. E. *et al.* Haploid genetic screens in human cells identify host factors used by  
891 pathogens. *Science* **326**, 1231-1235, doi:10.1126/science.1178955 (2009).
- 892 12 Wacker, S. A., Houghtaling, B. R., Elemento, O. & Kapoor, T. M. Using transcriptome  
893 sequencing to identify mechanisms of drug action and resistance. *Nat Chem Biol* **8**, 235-  
894 237, doi:10.1038/nchembio.779 (2012).
- 895 13 Bossaert, M. *et al.* Transcription-associated topoisomerase 2alpha activity is a major  
896 effector of cytotoxicity induced by G-quadruplex ligands. *eLife* **10**,  
897 doi:10.7554/eLife.65184 (2021).
- 898 14 Forment, J. V. *et al.* Genome-wide genetic screening with chemically mutagenized  
899 haploid embryonic stem cells. *Nat Chem Biol* **13**, 12-14, doi:10.1038/nchembio.2226  
900 (2017).
- 901 15 Brockmann, M. *et al.* Genetic wiring maps of single-cell protein states reveal an off-  
902 switch for GPCR signalling. *Nature* **546**, 307-311, doi:10.1038/nature22376 (2017).
- 903 16 Brereton, P. *et al.* Pan1b (17betaHSD11)-enzymatic activity and distribution in the lung.  
904 *Mol Cell Endocrinol* **171**, 111-117, doi:10.1016/s0303-7207(00)00417-2 (2001).
- 905 17 Horiguchi, Y., Araki, M. & Motojima, K. Identification and characterization of the ER/lipid  
906 droplet-targeting sequence in 17beta-hydroxysteroid dehydrogenase type 11. *Arch*  
907 *Biochem Biophys* **479**, 121-130, doi:10.1016/j.abb.2008.08.020 (2008).



- 908 18 Filling, C. *et al.* Critical residues for structure and catalysis in short-chain  
909 dehydrogenases/reductases. *J Biol Chem* **277**, 25677-25684,  
910 doi:10.1074/jbc.M202160200 (2002).
- 911 19 Listunov, D. *et al.* Methinylogation Approach in Chiral Pharmacophore Design: from  
912 Alkynyl- to Allenyl-carbinol Warheads against Tumor Cells. *ChemMedChem* **13**, 1711-  
913 1722, doi:10.1002/cmdc.201800284 (2018).
- 914 20 Bourkhis, M. *et al.* Skeletal Optimization of Cytotoxic Lipidic Dialkynylcarbinols.  
915 *ChemMedChem* **13**, 1124-1130, doi:10.1002/cmdc.201800118 (2018).
- 916 21 Grant, C. V. *et al.* CRISPR-Cas9 Genome-Wide Knockout Screen Identifies Mechanism  
917 of Selective Activity of Dehydrofalcariinol in Mesenchymal Stem-like Triple-Negative  
918 Breast Cancer Cells. *J Nat Prod* **83**, 3080-3092, doi:10.1021/acs.jnatprod.0c00642  
919 (2020).
- 920 22 Barretina, J. *et al.* The Cancer Cell Line Encyclopedia enables predictive modelling of  
921 anticancer drug sensitivity. *Nature* **483**, 603-607, doi:10.1038/nature11003 (2012).
- 922 23 Worch, J. C., Stubbs, C. J., Price, M. J. & Dove, A. P. Click Nucleophilic Conjugate  
923 Additions to Activated Alkynes: Exploring Thiol-yne, Amino-yne, and Hydroxyl-yne  
924 Reactions from (Bio)Organic to Polymer Chemistry. *Chem Rev* **121**, 6744-6776,  
925 doi:10.1021/acs.chemrev.0c01076 (2021).
- 926 24 Tornøe, C. W., Christensen, C. & Meldal, M. Peptidotriazoles on solid phase: [1,2,3]-  
927 triazoles by regioselective copper(i)-catalyzed 1,3-dipolar cycloadditions of terminal  
928 alkynes to azides. *J Org Chem* **67**, 3057-3064, doi:10.1021/jo011148j (2002).
- 929 25 Rostovtsev, V. V., Green, L. G., Fokin, V. V. & Sharpless, K. B. A stepwise Huisgen  
930 cycloaddition process: copper(I)-catalyzed regioselective "ligation" of azides and terminal  
931 alkynes. *Angew Chem Int Ed* **41**, 2596-2599, doi:10.1002/1521-  
932 3773(20020715)41:14<2596::AID-ANIE2596>3.0.CO;2-4 (2002).
- 933 26 Speers, A. E. & Cravatt, B. F. Profiling enzyme activities in vivo using click chemistry  
934 methods. *Chem Biol* **11**, 535-546, doi:10.1016/j.chembiol.2004.03.012 (2004).
- 935 27 Weerapana, E. *et al.* Quantitative reactivity profiling predicts functional cysteines in  
936 proteomes. *Nature* **468**, 790-795, doi:10.1038/nature09472 (2010).
- 937 28 Backus, K. M. *et al.* Proteome-wide covalent ligand discovery in native biological  
938 systems. *Nature* **534**, 570-574, doi:10.1038/nature18002 (2016).
- 939 29 Zanon, P. R. A., Lewald, L. & Hacker, S. M. Isotopically Labeled Desthiobiotin Azide  
940 (isoDTB) Tags Enable Global Profiling of the Bacterial Cysteinome. *Angew Chem Int Ed*  
941 **59**, 2829-2836, doi:10.1002/anie.201912075 (2020).
- 942 30 Zanon, P. R. A. *et al.* Profiling the Proteome-Wide Selectivity of Diverse Electrophiles.  
943 *ChemRxiv*, doi:10.33774/chemrxiv-2021-w7rss-v2 (2021).
- 944 31 Isom, D. G., Castaneda, C. A., Cannon, B. R. & Garcia-Moreno, B. Large shifts in pKa  
945 values of lysine residues buried inside a protein. *Proc Natl Acad Sci U S A* **108**, 5260-  
946 5265, doi:10.1073/pnas.1010750108 (2011).
- 947 32 Viedma-Poyatos, A. *et al.* Protein Lipoxidation: Basic Concepts and Emerging Roles.  
948 *Antioxidants (Basel)* **10**, doi:10.3390/antiox10020295 (2021).
- 949 33 Listunov, D. *et al.* Fluorophore-tagged pharmacophores for antitumor cytotoxicity:  
950 Modified chiral lipidic dialkynylcarbinols for cell imaging. *Bioorg Med Chem Lett* **25**, 4652-  
951 4656, doi:10.1016/j.bmcl.2015.08.029 (2015).
- 952 34 Vila, A. *et al.* Identification of protein targets of 4-hydroxynonenal using click chemistry  
953 for ex vivo biotinylation of azido and alkynyl derivatives. *Chem Res Toxicol* **21**, 432-444,  
954 doi:10.1021/tx700347w (2008).
- 955 35 Larrieu, D., Britton, S., Demir, M., Rodriguez, R. & Jackson, S. P. Chemical inhibition of  
956 NAT10 corrects defects of laminopathic cells. *Science* **344**, 527-532, doi:10.1126/science.1221111  
957 [pii]

- 958 10.1126/science.1252651 (2014).
- 959 36 Blomen, V. A. *et al.* Gene essentiality and synthetic lethality in haploid human cells.  
960 *Science* **350**, 1092-1096, doi:10.1126/science.aac7557 (2015).
- 961 37 Shi, Y. *et al.* Rpn1 provides adjacent receptor sites for substrate binding and  
962 deubiquitination by the proteasome. *Science* **351**, doi:10.1126/science.aad9421 (2016).
- 963 38 Menendez-Benito, V., Verhoef, L. G., Masucci, M. G. & Dantuma, N. P. Endoplasmic  
964 reticulum stress compromises the ubiquitin-proteasome system. *Hum Mol Genet* **14**,  
965 2787-2799, doi:10.1093/hmg/ddi312 (2005).
- 966 39 Mailand, N. *et al.* RNF8 ubiquitylates histones at DNA double-strand breaks and  
967 promotes assembly of repair proteins. *Cell* **131**, 887-900, doi:10.1016/j.cell.2007.09.040  
968 (2007).
- 969 40 Preissler, S. & Ron, D. Early Events in the Endoplasmic Reticulum Unfolded Protein  
970 Response. *Cold Spring Harb Perspect Biol* **11**, doi:10.1101/cshperspect.a033894 (2019).
- 971 41 Kavanagh, K. L., Jornvall, H., Persson, B. & Oppermann, U. Medium- and short-chain  
972 dehydrogenase/reductase gene and protein families : the SDR superfamily: functional  
973 and structural diversity within a family of metabolic and regulatory enzymes. *Cell Mol Life*  
974 *Sci* **65**, 3895-3906, doi:10.1007/s00018-008-8588-y (2008).
- 975 42 Kedishvili, N. Y. *et al.* Evidence that the human gene for prostate short-chain  
976 dehydrogenase/reductase (PSDR1) encodes a novel retinal reductase (RalR1). *J Biol*  
977 *Chem* **277**, 28909-28915, doi:10.1074/jbc.M202588200 (2002).
- 978 43 Haeseleer, F. *et al.* Dual-substrate specificity short chain retinol dehydrogenases from  
979 the vertebrate retina. *J Biol Chem* **277**, 45537-45546, doi:10.1074/jbc.M208882200  
980 (2002).
- 981 44 Tai, H. H., Cho, H., Tong, M. & Ding, Y. NAD<sup>+</sup>-linked 15-hydroxyprostaglandin  
982 dehydrogenase: structure and biological functions. *Current pharmaceutical design* **12**,  
983 955-962, doi:10.2174/138161206776055958 (2006).
- 984 45 Cui, C. *et al.* Total Synthesis and Target Identification of the Curcusone Diterpenes. *J Am*  
985 *Chem Soc* **143**, 4379-4386, doi:10.1021/jacs.1c00557 (2021).
- 986 46 Shringarpure, R., Grune, T., Sitte, N. & Davies, K. J. 4-Hydroxynonenal-modified  
987 amyloid-beta peptide inhibits the proteasome: possible importance in Alzheimer's  
988 disease. *Cell Mol Life Sci* **57**, 1802-1809, doi:10.1007/pl00000660 (2000).
- 989 47 Bray, J. E., Marsden, B. D. & Oppermann, U. The human short-chain  
990 dehydrogenase/reductase (SDR) superfamily: a bioinformatics summary. *Chemico-*  
991 *biological interactions* **178**, 99-109, doi:10.1016/j.cbi.2008.10.058 (2009).
- 992 48 Chang, K. H. *et al.* A gain-of-function mutation in DHT synthesis in castration-resistant  
993 prostate cancer. *Cell* **154**, 1074-1084, doi:10.1016/j.cell.2013.07.029 (2013).
- 994 49 Thomas, L. & Sharifi, N. Germline HSD3B1 Genetics and Prostate Cancer Outcomes.  
995 *Urology* **145**, 13-21, doi:10.1016/j.urology.2020.08.028 (2020).
- 996 50 Hearn, J. W. D. *et al.* HSD3B1 Genotype and Clinical Outcomes in Metastatic Castration-  
997 Sensitive Prostate Cancer. *JAMA Oncol* **6**, e196496, doi:10.1001/jamaoncol.2019.6496  
998 (2020).
- 999 51 Kallberg, Y., Oppermann, U. & Persson, B. Classification of the short-chain  
1000 dehydrogenase/reductase superfamily using hidden Markov models. *FEBS J* **277**, 2375-  
1001 2386, doi:10.1111/j.1742-4658.2010.07656.x (2010).
- 1002 52 Hacker, S. M. *et al.* Global profiling of lysine reactivity and ligandability in the human  
1003 proteome. *Nat Chem* **9**, 1181-1190, doi:10.1038/nchem.2826 (2017).
- 1004 53 Abbasov, M. E. *et al.* A proteome-wide atlas of lysine-reactive chemistry. *Nat Chem*,  
1005 doi:10.1038/s41557-021-00765-4 (2021).
- 1006 54 Costantini, L. M. *et al.* A palette of fluorescent proteins optimized for diverse cellular  
1007 environments. *Nat Commun* **6**, 7670, doi:10.1038/ncomms8670 (2015).

- 1008 55 Olenych, S. G., Claxton, N. S., Ottenberg, G. K. & Davidson, M. W. The fluorescent  
1009 protein color palette. *Curr Protoc Cell Biol* **Chapter 21**, Unit 21 25,  
1010 doi:10.1002/0471143030.cb2105s36 (2007).
- 1011 56 Britton, S. *et al.* DNA damage triggers SAF-A and RNA biogenesis factors exclusion from  
1012 chromatin coupled to R-loops removal. *Nucleic Acids Res* **42**, 9047-9062,  
1013 doi:10.1093/nar/gku601 (2014).
- 1014 57 Britton, S., Coates, J. & Jackson, S. P. A new method for high-resolution imaging of Ku  
1015 foci to decipher mechanisms of DNA double-strand break repair. *J Cell Biol* **202**, 579-  
1016 595, doi:10.1083/jcb.201303073 (2013).
- 1017 58 Carette, J. E. *et al.* Ebola virus entry requires the cholesterol transporter Niemann-Pick  
1018 C1. *Nature* **477**, 340-343, doi:10.1038/nature10348 (2011).
- 1019 59 Slaymaker, I. M. *et al.* Rationally engineered Cas9 nucleases with improved specificity.  
1020 *Science* **351**, 84-88, doi:10.1126/science.aad5227 (2016).
- 1021 60 Streit, M. *et al.* Ordino: a visual cancer analysis tool for ranking and exploring genes, cell  
1022 lines and tissue samples. *Bioinformatics* **35**, 3140-3142,  
1023 doi:10.1093/bioinformatics/btz009 (2019).
- 1024 61 Mariette, J. *et al.* NG6: Integrated next generation sequencing storage and processing  
1025 environment. *BMC Genomics* **13**, 462, doi:10.1186/1471-2164-13-462 (2012).
- 1026 62 Li, H. & Durbin, R. Fast and accurate short read alignment with Burrows-Wheeler  
1027 transform. *Bioinformatics* **25**, 1754-1760, doi:10.1093/bioinformatics/btp324 (2009).
- 1028 63 Dobin, A. *et al.* STAR: ultrafast universal RNA-seq aligner. *Bioinformatics* **29**, 15-21,  
1029 doi:10.1093/bioinformatics/bts635 (2013).
- 1030 64 Liao, Y., Smyth, G. K. & Shi, W. featureCounts: an efficient general purpose program for  
1031 assigning sequence reads to genomic features. *Bioinformatics* **30**, 923-930,  
1032 doi:10.1093/bioinformatics/btt656 (2014).
- 1033 65 McKenna, A. *et al.* The Genome Analysis Toolkit: a MapReduce framework for analyzing  
1034 next-generation DNA sequencing data. *Genome Res* **20**, 1297-1303,  
1035 doi:10.1101/gr.107524.110 (2010).
- 1036 66 Cingolani, P. *et al.* A program for annotating and predicting the effects of single  
1037 nucleotide polymorphisms, SnpEff: SNPs in the genome of *Drosophila melanogaster*  
1038 strain w1118; iso-2; iso-3. *Fly (Austin)* **6**, 80-92, doi:10.4161/fly.19695 (2012).
- 1039 67 Shannon, P. *et al.* Cytoscape: a software environment for integrated models of  
1040 biomolecular interaction networks. *Genome Res* **13**, 2498-2504, doi:10.1101/gr.1239303  
1041 (2003).
- 1042 68 Perez-Riverol, Y. *et al.* The PRIDE database and related tools and resources in 2019:  
1043 improving support for quantification data. *Nucleic Acids Res* **47**, D442-D450,  
1044 doi:10.1093/nar/gky1106 (2019).
- 1045 69 Thomsen, M. C. & Nielsen, M. Seq2Logo: a method for construction and visualization of  
1046 amino acid binding motifs and sequence profiles including sequence weighting, pseudo  
1047 counts and two-sided representation of amino acid enrichment and depletion. *Nucleic*  
1048 *Acids Res* **40**, W281-287, doi:10.1093/nar/gks469 (2012).
- 1049 70 Rozie, A. *et al.* Alkyne-Tagged Analogue of Jaspine B: New Tool for Identifying Jaspine  
1050 B Mode of Action. *ChemBiochem* **19**, 2438-2442, doi:10.1002/cbic.201800496 (2018).

1051

1052 FIGURES & FIGURE LEGENDS

Figure 1

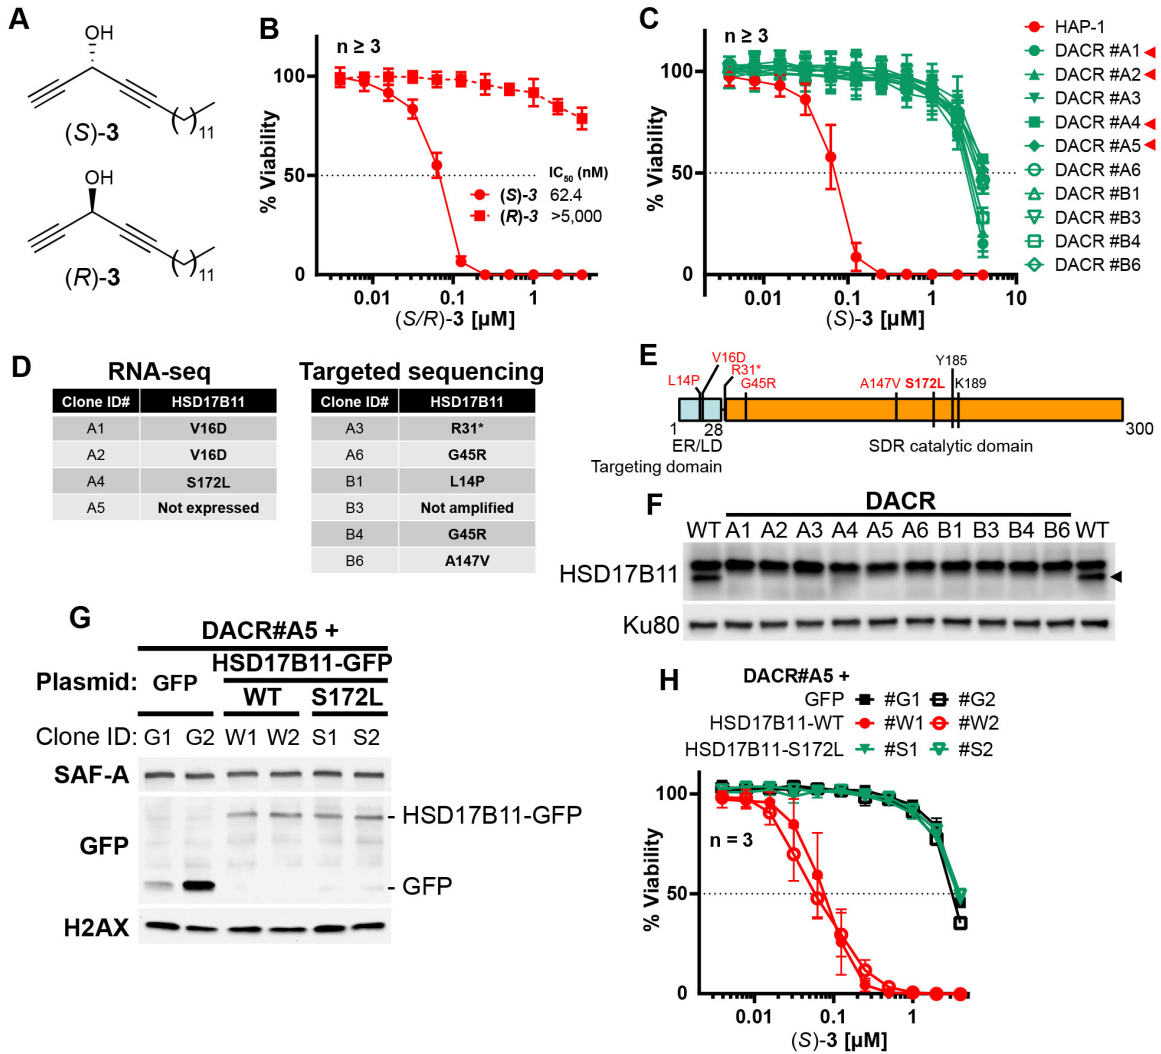

1053

1054 **Figure 1: HSD17B11 is necessary for DAC (S)-3 cytotoxic activity. A.** DAC (S)-3 and (R)-3  
1055 structures. **B.** Cell viability analysis of HAP-1 or U2OS cells treated for 72 h with the indicated  
1056 concentrations of (S)- or (R)-3. **C.** Cell viability analysis of individual DAC-resistant clones or wild-  
1057 type HAP-1 treated for 72 h with the indicated concentrations of (S)-3. **D.** List of mutations  
1058 identified by RNA-seq or targeted sequencing of HSD17B11 in individual DAC-resistant clones.  
1059 **E.** Schematic representation of HSD17B11 functional domains. The positions of the identified  
1060 mutations are indicated in red. The Y185, K189 (indicated in black) and S172 amino acids are  
1061 critical for catalysis. **F.** Analysis by immunoblotting of HSD17B11 levels in wild-type HAP-1 and  
1062 DAC-resistant clones. Ku80 was used as a loading control. The black arrow indicates HSD17B11  
1063 position. **G.** Analysis by immunoblotting of HSD17B11-GFP levels in individual clones of DAC-  
1064 resistant clone A5 complemented with GFP, wild-type or S172L mutant HSD17B11-GFP. SAF-A  
1065 and total H2AX were used as loading controls. **H.** Cell viability analysis of individual clones of  
1066 DAC-resistant clone A5 complemented with GFP, wild-type or S172L mutant HSD17B11-GFP  
1067 treated for 72 h with the indicated concentrations of (S)-3.

1068



**Figure 2**

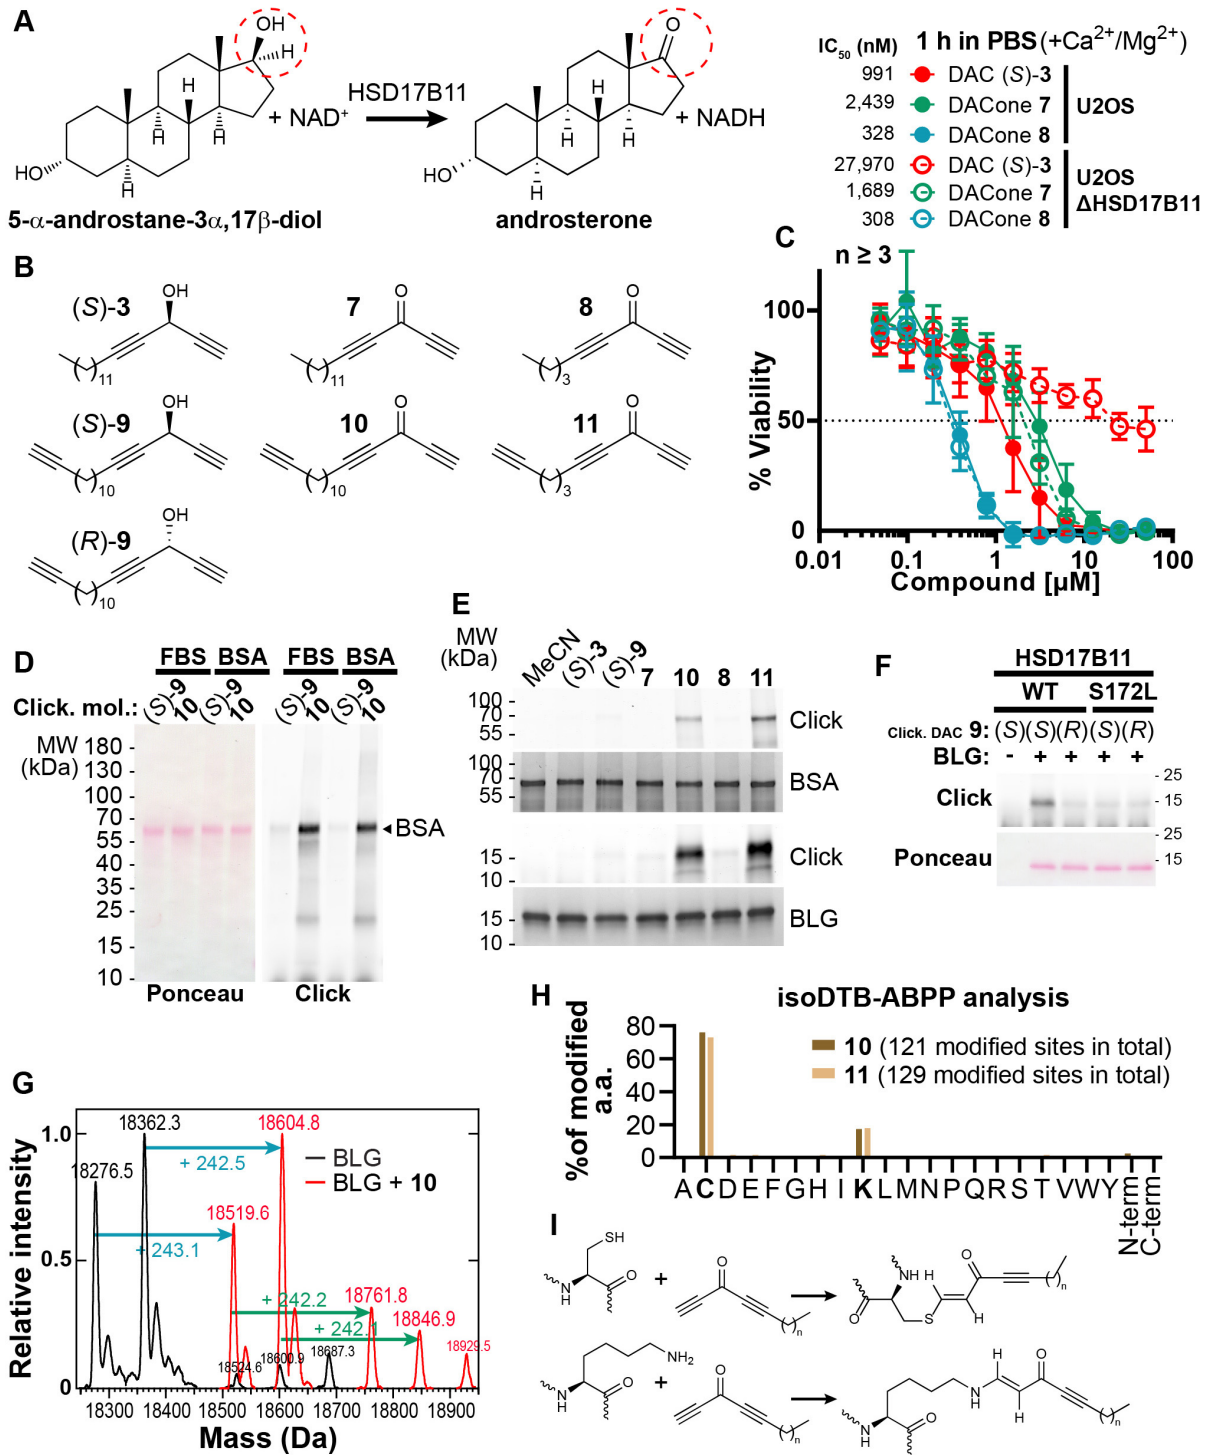

1069

1070 **Figure 2: DACones are protein reactive species. A.** Reaction catalyzed by HSD17B11. **B.**  
1071 Clickable DACs and DACones used in the study. **C.** Viability analysis of U2OS cells treated in  
1072 PBS for 1 h with (S)-**3** or DACones and incubated for an additional 72 h after drug washout. **D.**  
1073 FBS or purified BSA were incubated 40 min at 30 °C with clickable DAC (S)-**9** or clickable DACone  
1074 **10**. After reaction, CuAAC was used to ligate an azido-AlexaFluor647 to clickable molecules.  
1075 Modified proteins were detected by scanning membrane fluorescence after SDS-PAGE and  
1076 transfer. Ponceau S stains total proteins. **E.** BSA or BLG were incubated with the indicated DACs  
1077 or DACones, as in **D**. After reaction, modified proteins were detected as in **D**. Coomassie stains  
1078 total proteins. **F.** WT or S172L HSD17B11-GFP were immunoprecipitated from complemented  
1079 U2OS KO HSD17B11 cells and incubated with clickable DAC **9** and BLG. After reaction modified  
1080 proteins were detected as in **d**. **G.** Analysis by direct-infusion mass spectrometry of purified BLG  
1081 (mixture of isoform A and B) modified or not by DACone **10**. Cyan and green arrows indicate the  
1082 formation of a first and second adduct, respectively. **H.** % of each amino acid detected as modified  
1083 by DACones **10** or **11** in U2OS extracts as determined using a isoDTB-ABPP-based framework.  
1084 **I.** Proposed reactions of DACones with cysteine and lysine side chains in proteins.

1085

**Figure 3**

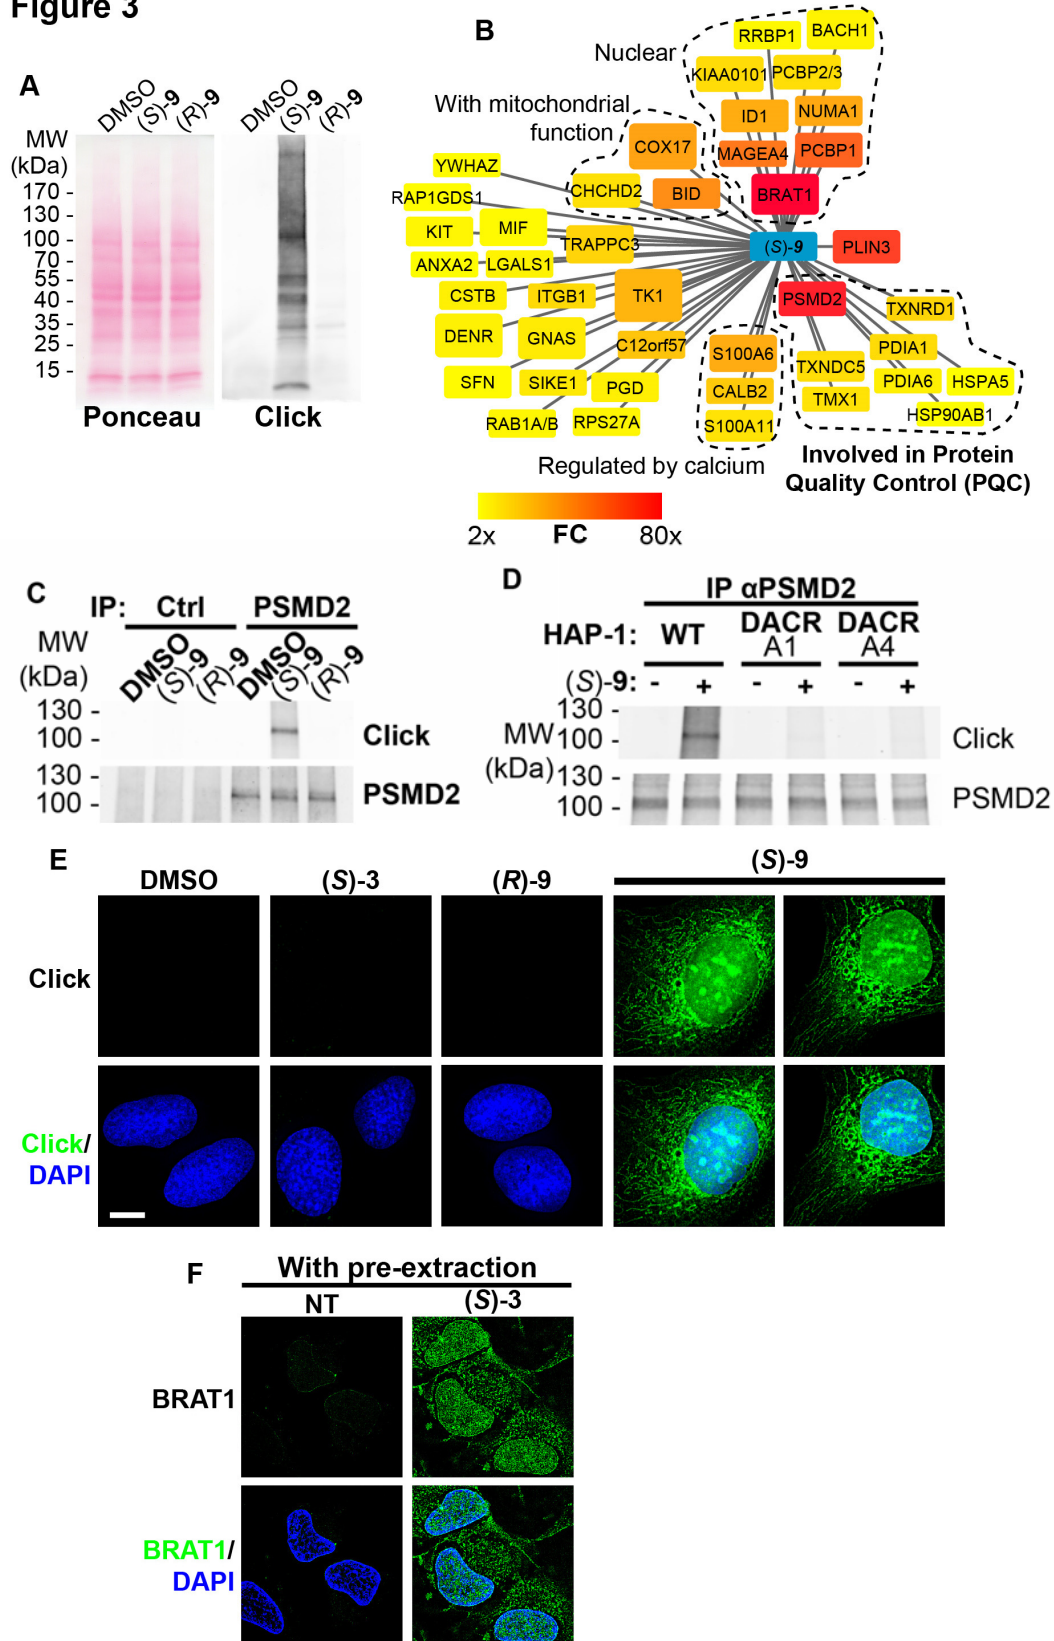



1087 **Figure 3: (S)-DACs lipoxidize multiple cellular proteins, triggering their association with**  
1088 **cellular membranes. A.** U2OS cells were incubated for 2 h with 2  $\mu$ M (S)- or (R)-**9**, proteins were  
1089 extracted and DAC-modified proteins were detected by CuAAC-mediated ligation of azido-  
1090 AlexaFluor-647 to clickable molecules, separation by SDS-PAGE, transfer to a membrane which  
1091 was scanned for fluorescence. **B.** Landscape of proteins modified in U2OS cells by clickable DAC  
1092 (S)-**9** computed from 3 independent experiments. Fold enrichment (FC) as compared to the  
1093 clickable (R)-**9** is computed and color-coded as depicted. Box size corresponds to  $-\log(p)$   
1094 computed as described in the materials and methods section. **C.** PSMD2 or control  
1095 immunoprecipitations (Ctrl) were performed from extracts of U2OS cells treated 2 h with 2  $\mu$ M  
1096 clickable DAC (S)- or (R)-**9**. DAC-modified proteins were detected by CuAAC-mediated ligation of  
1097 azido-AlexaFluor-647 to clickable molecules, separation by SDS-PAGE, transfer to a membrane,  
1098 which was scanned for fluorescence. PSMD2 was subsequently visualized by immunoblotting. **D.**  
1099 PSMD2 immunoprecipitations were performed from extracts of wild-type or DAC-resistant HAP-1  
1100 cells treated or not for 2 h with 2  $\mu$ M clickable DAC (S)-**9**. DAC-modified proteins were detected  
1101 by CuAAC-mediated ligation as in (c) PSMD2 was subsequently visualized by immunoblotting. **E.**  
1102 U2OS cells were treated 2 h with 0.5  $\mu$ M DAC, fixed, permeabilized, and clickable molecules were  
1103 detected by click with AlexaFluor488 azide. **F.** U2OS expressing GFP-BRAT1 were treated 2 h  
1104 with 1  $\mu$ M (S)-**3**, pre-extracted, fixed and processed for analysis by fluorescence microscopy.

1105

**Figure 4**

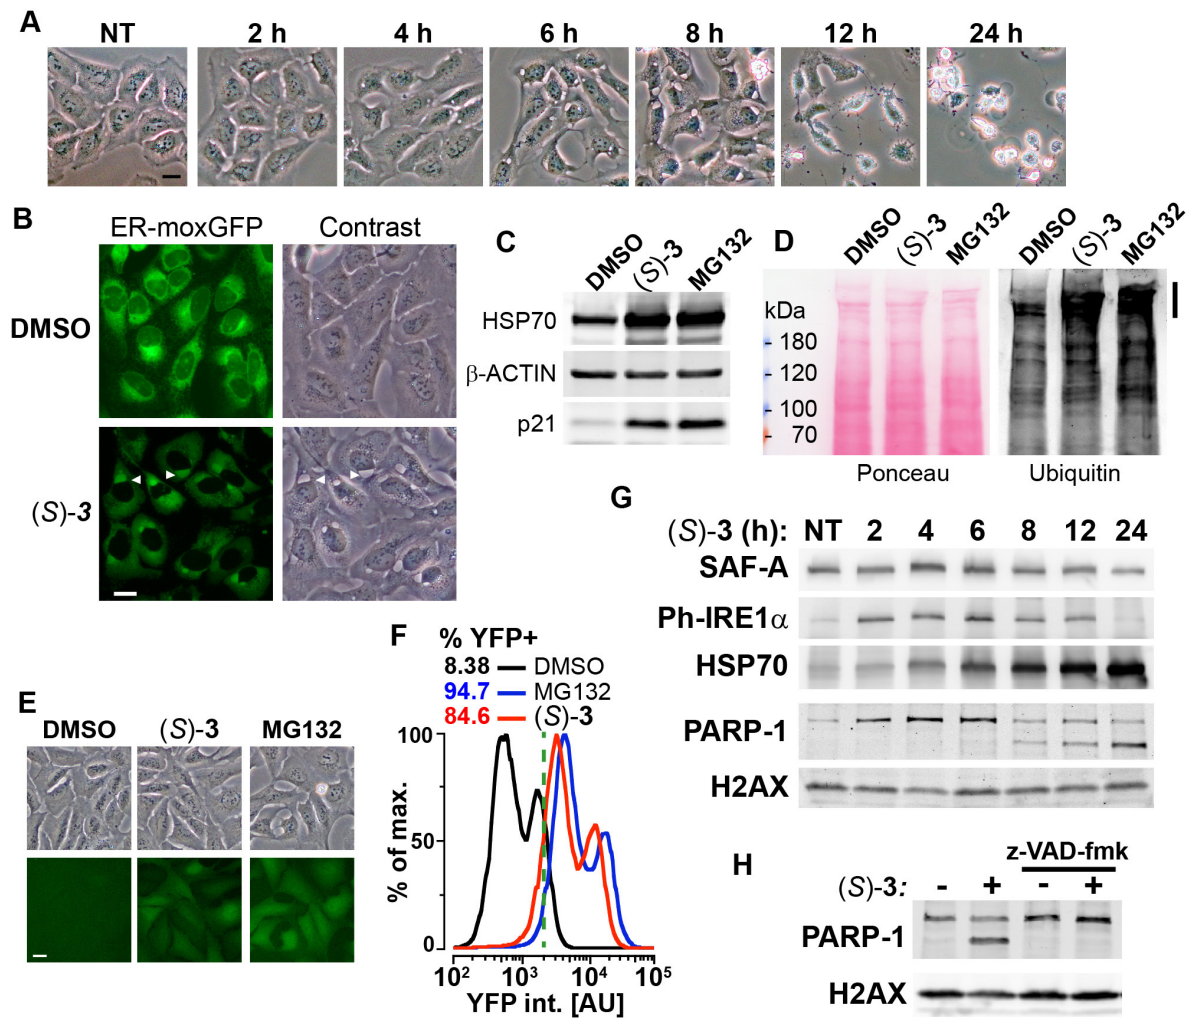

1106

1107 **Figure 4: DAC (S)-3 triggers ER-stress, proteasome inhibition and apoptosis. A.** U2OS  
1108 stably co-expressing a GFP variant addressed and retained in the endoplasmic reticulum were  
1109 treated with 1  $\mu\text{M}$  (S)-3 and monitored by live imaging. Representative pictures of U2OS cells  
1110 either untreated (NT) or treated with 1  $\mu\text{M}$  (S)-3 for the indicated time. **B.** Representative pictures  
1111 of U2OS with stably GFP-labeled endoplasmic reticulum and either untreated or treated for 8 h  
1112 with 1  $\mu\text{M}$  (S)-3. **C.** Immunoblotting of extracts from U2OS untreated or treated with 1  $\mu\text{M}$  (S)-3 or  
1113 20  $\mu\text{M}$  MG132 for 8 h. **D.** Immunoblotting of ubiquitin in extracts from U2OS untreated or treated  
1114 with 1  $\mu\text{M}$  (S)-3 or 20  $\mu\text{M}$  MG132 for 2 h. High molecular weight ubiquitin conjugates are indicated  
1115 by a vertical bar on the right. **E.** Representative pictures of U2OS stably expressing Ub-G76V-  
1116 YFP and either untreated or treated for 4 h with 1  $\mu\text{M}$  (S)-3 or 20  $\mu\text{M}$  MG132. **F.** Analysis of YFP  
1117 fluorescence by flow cytometry of U2OS Ub-G76V-YFP treated as described in **E.** % of cells  
1118 scored as positives using the vertical green bar as a threshold are indicated. **G.** Immunoblotting  
1119 using extracts from U2OS cells treated with 1  $\mu\text{M}$  (S)-3 for increasing times, indicated in hours. **H.**  
1120 Immunoblotting using extracts from U2OS cells treated with 1  $\mu\text{M}$  (S)-3 for 12 h with or without 50  
1121  $\mu\text{M}$  z-VAD-fmk.

1122

**Figure 5**

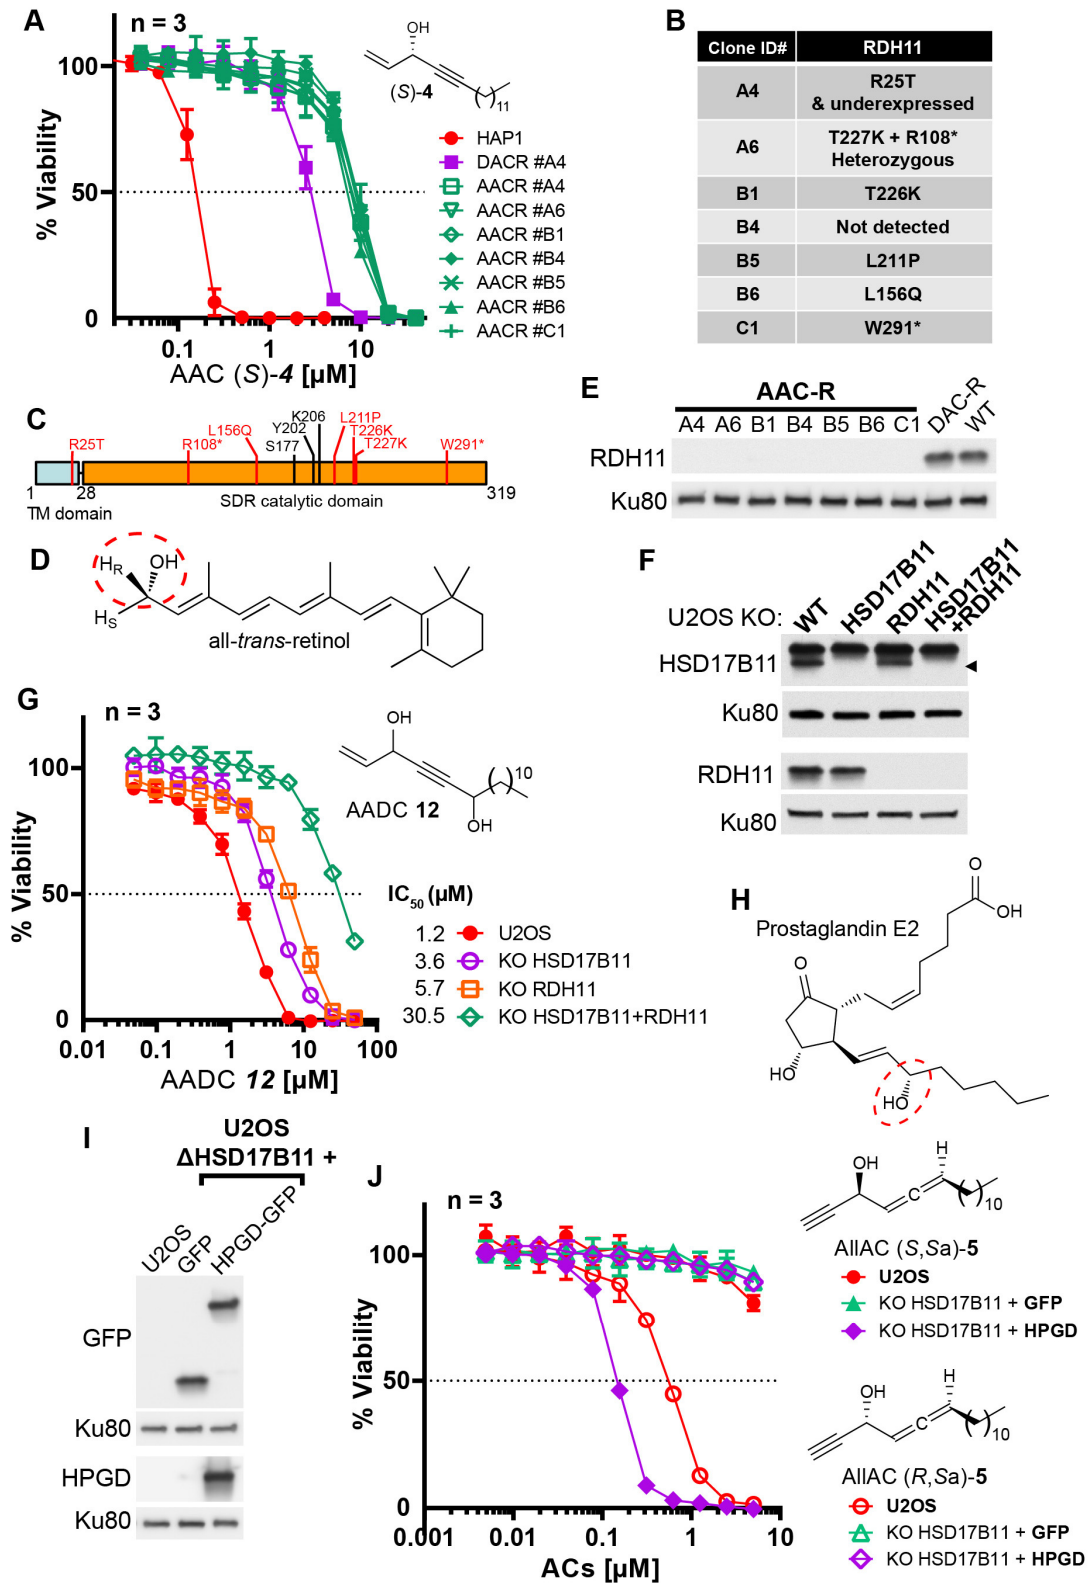

1124 **Figure 5: Bioactivation of other lipidic alkynylcarbinols by specific SDRs. A.** Cell viability  
1125 analysis of wild-type HAP-1, DACR clone A4 and AACR clones treated with AAC (*S*)-**4**. **B.** List of  
1126 mutations identified on RDH11 by RNA-seq of individual AACR clones. **C.** Schematic  
1127 representation of RDH11 with, in red, the positions of the mutations identified and, in black, the  
1128 three amino acids critical for catalysis. TM = single-pass transmembrane domain. **D.** Structure of  
1129 all-*trans*-retinol, a substrate for RDH11. **E.** Analysis by immunoblotting of RDH11 levels in wild-  
1130 type HAP-1, in DACR clone A4 and in the different AACR clones. **F.** Analysis by immunoblotting  
1131 of RDH11 and HSD17B11 levels in wild-type U2OS or clones inactivated for either HSD17B11,  
1132 RDH11 or both. **G.** Cell viability analysis of wild-type U2OS or U2OS clones inactivated for  
1133 HSD17B11, RDH11, or both and treated with AADC **12**. **H.** Structure of prostaglandin E2, a  
1134 substrate of HPGD. **I.** Analysis by immunoblotting of GFP and HPGD levels in WT U2OS or U2OS  
1135 KO HSD17B11 stably complemented with GFP or HPGD-GFP. **J.** Cell viability analysis of U2OS  
1136 or U2OS inactivated for HSD17B11, stably complemented with either HSD17B11-GFP or HPGD-  
1137 GFP and treated for 72 h with AllAC (*S,Sa*)- or (*R,Sa*)-**5**.

1138

Figure 6

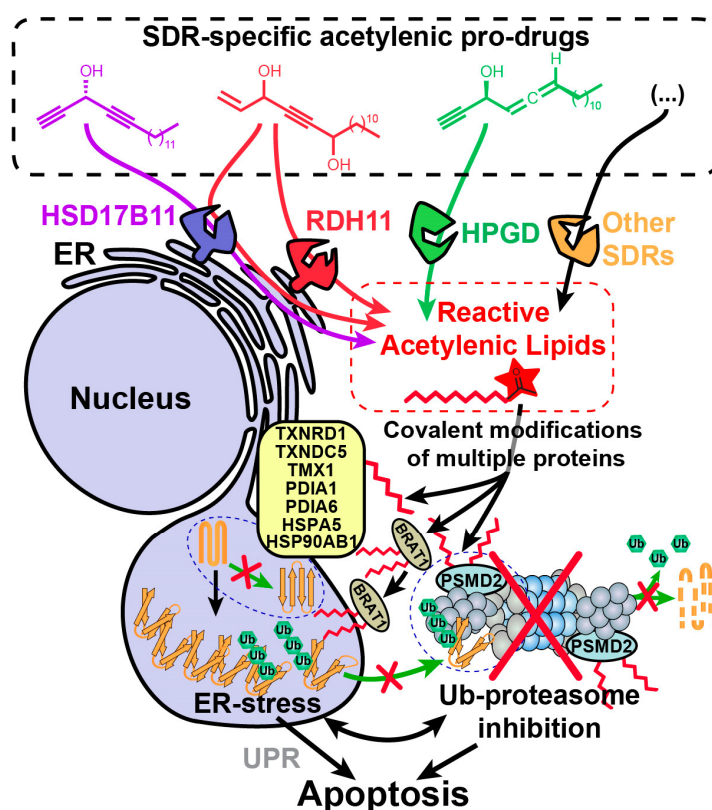

1139

1140

1141 **Figure 6:** Model depicting the stereospecific bioactivation of alkynylcarbinol-containing  
1142 compounds by specific SDRs into cytotoxic protein-reactive species. The protein reactive species  
1143 generated upon bioactivation modify several proteins including the essential 26S proteasome  
1144 subunit PSMD2, thereby triggering Ub-proteasome system (UPS) inhibition, ER-stress, activation  
1145 of the Unfolded Protein Response (UPR) and cell death mediated by apoptosis.

1146



## Graphical abstract

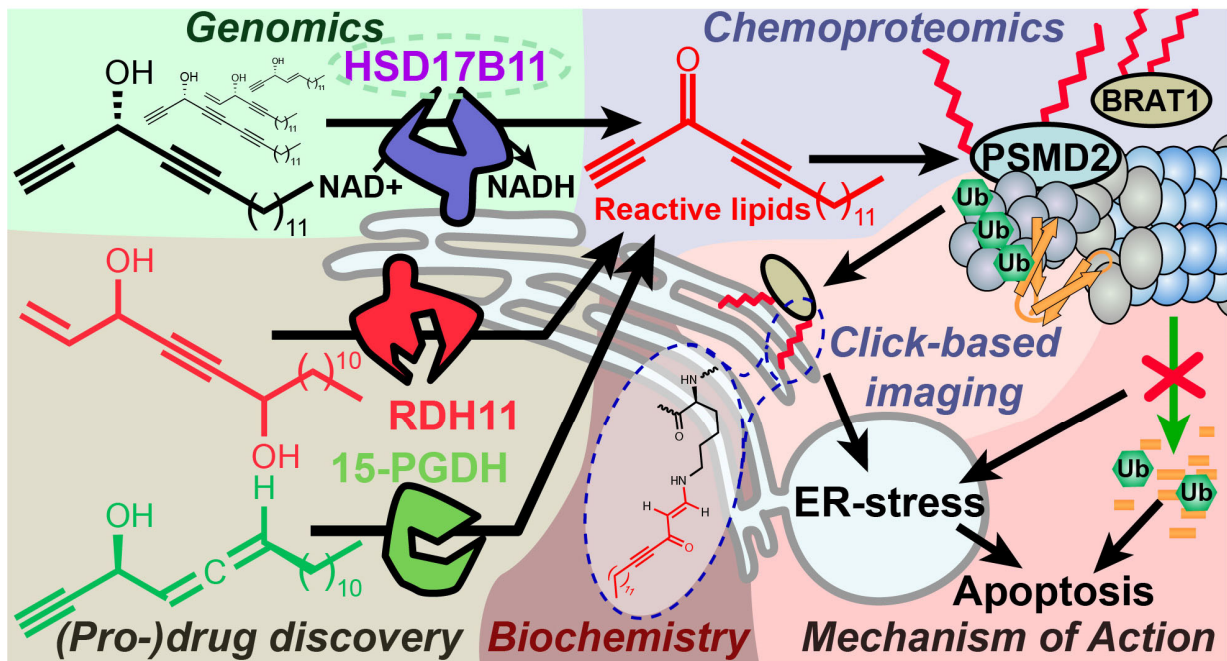

1147
